# Supplementary material for: Prevalence and characteristics of chronic fatigue syndrome/myalgic encephalomyelitis (CFS/ME) in Poland: a cross-sectional study
Source: PubMed Central journal article supplement — BMJ Open. 2019 Mar 7;9(3):e023955. doi: 10.1136/bmjopen-2018-023955 (PMC6429942; doi:10.1136/bmjopen-2018-023955), 2019-03-07
Supplement: bmjopen-2018-023955.draft_revisions.pdf [file bmjopen-2018-023955.draft_revisions.pdf]

# BMJ Open

BMJ Open is committed to open peer review. As part of this commitment we make the peer review history of every article we publish publicly available.

When an article is published we post the peer reviewers' comments and the authors' responses online. We also post the versions of the paper that were used during peer review. These are the versions that the peer review comments apply to.

The versions of the paper that follow are the versions that were submitted during the peer review process. They are not the versions of record or the final published versions. They should not be cited or distributed as the published version of this manuscript.

BMJ Open is an open access journal and the full, final, typeset and author-corrected version of record of the manuscript is available on our site with no access controls, subscription charges or pay-per-view fees (<http://bmjopen.bmj.com>).

If you have any questions on BMJ Open's open peer review process please email [info.bmjopen@bmj.com](mailto:info.bmjopen@bmj.com)

# BMJ Open

## Is chronic fatigue syndrome common in Poland ?

|                               |                                                                                                                                                                                                                                                                                                                                                                                                                                                                                                                                                                                                |
|-------------------------------|------------------------------------------------------------------------------------------------------------------------------------------------------------------------------------------------------------------------------------------------------------------------------------------------------------------------------------------------------------------------------------------------------------------------------------------------------------------------------------------------------------------------------------------------------------------------------------------------|
| Journal:                      | <i>BMJ Open</i>                                                                                                                                                                                                                                                                                                                                                                                                                                                                                                                                                                                |
| Manuscript ID                 | bmjopen-2018-023955                                                                                                                                                                                                                                                                                                                                                                                                                                                                                                                                                                            |
| Article Type:                 | Research                                                                                                                                                                                                                                                                                                                                                                                                                                                                                                                                                                                       |
| Date Submitted by the Author: | 04-May-2018                                                                                                                                                                                                                                                                                                                                                                                                                                                                                                                                                                                    |
| Complete List of Authors:     | Slomko, Joanna; Uniwersytet Mikolaja Kopernika Collegium Medicum, Department of Hygiene, Epidemiology and Ergonomy<br>Zalewski, Pawel; Uniwersytet Mikolaja Kopernika Collegium Medicum, Kujawski, Sławomir; Uniwersytet Mikolaja Kopernika Collegium Medicum, Department of Hygiene, Epidemiology and Ergonomy<br>Tafil-Klawe, Małgorzata; Uniwersytet Mikolaja Kopernika Collegium Medicum, Department of Human Physiology,<br>Klawe, Jacek; Collegium Medicum in Bydgoszcz, Nicolaus Coprenicus University in Torun<br>Newton, Julia; Newcastle University , Institute of Cellular Medicine |
| Keywords:                     | EPIDEMIOLOGY, CARDIOLOGY, SLEEP MEDICINE                                                                                                                                                                                                                                                                                                                                                                                                                                                                                                                                                       |
|                               |                                                                                                                                                                                                                                                                                                                                                                                                                                                                                                                                                                                                |

SCHOLARONE™  
Manuscripts

Peer Review Only

### Is chronic fatigue syndrome common in Poland ?

Joanna Słomko<sup>a</sup>, Paweł Zalewski<sup>a</sup>, Sławomir Kujawski, Małgorzata Tafil-Klawe<sup>b</sup>, Jacek J. Klawe<sup>a</sup>, Julia L. Newton<sup>c</sup>

<sup>a</sup>Department of Hygiene, Epidemiology and Ergonomy, Faculty of Health Sciences Ludwik Rydygier Collegium Medicum in Bydgoszcz Nicolaus Copernicus University in Torun, M. Skłodowskiej-Curie 9, Bydgoszcz 85-094, Poland

<sup>b</sup>Department of Human Physiology, Faculty of Medicine Ludwik Rydygier Collegium Medicum in Bydgoszcz Nicolaus Copernicus University in Torun, Ludwik Rydygier Collegium Medicum in Bydgoszcz, Karłowicza 24, Bydgoszcz 85-092, Poland

<sup>c</sup>Institute of Cellular Medicine, The Medical School, Newcastle University, Framlington Place Newcastle-upon-Tyne NE2 4HH

Corresponding author:

Paweł Zalewski

Department of Hygiene, Epidemiology and Ergonomics, Nicolaus Copernicus University in Torun, M. Skłodowskiej-Curie 9, 85-094 Bydgoszcz, Poland;

tel. +48 52 585-36-16; E-mail: p.zalewski@cm.umk.pl

## Abstract

**Objectives** This project considered whether CFS was a condition identifiable in a Polish population. We also set out to define the presence and characteristics of CFS in Poland in order to identify a cohort of those with who could potentially participate in further research studies.

**Design** observational study

**Setting** Poland

**Participants** We evaluated a cohort of 1400 participants, 92 of them complained of at least 6 months of unusual fatigue that was not relieved by rest. During face to face interview with the 92, self-report or record review revealed a medical or psychiatric condition that could have explained the fatigue in 23; 69 (0.05%) participants met Fukuda criteria for CFS.

**Main outcome measures** Participants completed the following screening symptom assessment tools: Chalder fatigue scale, Hospital anxiety and depression scale (HADS), Epworth sleepiness scale (ESS), COMPASS 31, Quality of life scale (QOLS), Functional assessment of the cardiac and autonomic nervous system.

**Results** The majority had experienced symptoms for over 2 years with 37% having symptoms for 2-5 years and 21.7% for more than 10 years. Compass 31 scores indicated that 50% have symptoms consistent with orthostatic intolerance. 43/69 (62%) had Epworth sleepiness scores  $\geq 10$  i.e. consistent with excessive daytime sleepiness, 26/69 (38%) had significant anxiety and 22/69 (32%) depression measured by HADS A & D. Quality of life is significantly impaired in those with Fukuda criteria CFS (mean (SD) QOLS score 64 (11)) with significant negative relationships between quality of life and fatigue ( $p < 0.0001$ ), anxiety ( $p = 0.0009$ ), depression ( $p < 0.0001$ ) and autonomic symptoms ( $p = 0.04$ ).

**Conclusion** CFS is a significant previously unrecognized problem in a Polish population.

**Strengths and limitations of this study**

- This is the first study to summarize illness characteristics of a cohort of Polish CFS/ME patients.
- This study determine whether diagnostic criteria in common use in the UK are identify phenotypically similar cohorts of patients.
- Methodologically robust epidemiological study of fatigue and its consequences in a Polish population are now needed.

For peer review only

## INTRODUCTION

Chronic fatigue syndrome (CFS) is considered to be a common condition in countries such as the UK, Australia and the US [1,2]. In the UK, it affects up to 250,000 individuals with frequencies reported of up to 0.2% [3]. These cohorts confirm that CFS can affect any age and is more frequent in females. To date CFS has not been reported in Poland, nor its prevalence defined. There are currently no CFS Clinical services.

This project considered whether CFS was a condition identifiable in a Polish population and to determine whether diagnostic criteria in common use in the UK [4] would identify phenotypically similar cohorts of patients. We also set out to define the presence and characteristics of CFS in Poland in order to identify a cohort of those with who could potentially participate in further research studies.

The study team identified potential CFS patients through a series of radio advertisements inviting individuals who thought they may be affected by this condition to self-present themselves to the research team (supplementary data). Subsequently those who were identified as having symptoms consistent with the Centers for Disease Control and Prevention (Fukuda) criteria were invited to participate in a more extensive research protocol. In this current study we describe the characteristics of this cohort.

## METHODS

### Process

Over a 2 week period 2 local radio broadcasts & 2 local television interviews were delivered. Over the next 2 weeks after considerable media interest, 2 national newspapers and a national TV station subsequently also ran details. Each of these media interactions included information about chronic fatigue syndrome (CFS) and the fact that Nicolaus Copernicus University, Poland were setting up a research programme. The national television article also included an interview with an eminent US researcher in the field describing their successful research programme. Details of the content of these media campaigns are contained in the supplementary data section.

Initially any individuals willing to participate were directed to a phone line. Within days of setting up the phone line it became clear that this mechanism to identify and recruit potential participants would be overwhelmed. The team therefore directed all potential participants to a website where more information about the study was available and where individuals were invited to self-complete the Fukuda criteria online. If individuals, on completing the online scoring felt that they met the Fukuda criteria [4] they were invited to contact the research team by email.

1  
2  
3 The research team then completed a series of screening questions which clarified whether the  
4 Fukuda criteria was met. Those passing this screening stage were invited to attend the  
5 research facility. The identification process is shown in **Figure 1**.  
6  
7

### 8 **Clinical assessment**

9  
10 Those who fulfilled the eligibility criteria for Centers for Disease Control and Prevention  
11 (Fukuda) were invited to attend the research unit at the chronobiology laboratory (windowless  
12 and sound-insulated room, temperature 22°C, humidity 60%). They were seen by members of  
13 the research team in an assessment that took place over 40 minutes. All assessments took  
14 place during the period of March 2014 to July 2016. Individuals participated in a standardized  
15 baseline assessment which comprised of a battery of symptom assessment tools. Those  
16 screened as fulfilling criteria for CFS [4] were also reviewed clinically by a member of the  
17 research team in order to determine whether their symptoms were consistent with this criteria,  
18 that there were no psychiatric exclusions or other diagnoses that could be associated with  
19 chronic fatigue syndrome or where fatigue was not the primary complaint. 69 individuals  
20 subsequently went on to have a further baseline objective assessment.  
21  
22  
23  
24  
25  
26  
27

### 28 **Symptom assessment tools**

29 Participants completed the following screening symptom assessment tools.  
30

#### 31 Measure of fatigue - Chalder fatigue scale [5]

32 The Chalder Fatigue Scale (CFQ) is a self-administered questionnaire for measuring the  
33 extent and severity of fatigue within both clinical and non-clinical, epidemiological  
34 populations.  
35  
36

37 The CFQ provides an 11 item brief tool to measure both physical and psychological fatigue.  
38 Each item is answered on a 4-point scale ranging from the asymptomatic to maximum  
39 symptomology, such as 'Better than usual', 'No worse than usual', 'Worse than usual' and  
40 'Much worse than usual'. For all items, the least symptomatic answers are on the left of the  
41 response-set, providing an easy-to-understand checklist for respondents. Using the Likert  
42 scoring method, responses on the extreme left receive a score of 0, increasing to 1, 2 or 3 as  
43 they become more symptomatic. The respondent's global score ranges from 0 to 33. The  
44 global score also spans two dimensions—physical fatigue (measured by items 1–7) and  
45 psychological fatigue (measured by items 8–11). The Likert scoring system allows for means  
46 and distributions to be calculated for both the global total as well as the two sub-scales.  
47  
48  
49  
50  
51  
52

53 Reliability coefficients for the CFQ 11 have been high in studies of CFS patients [6]. It has  
54 been used widely in studies ascertaining tiredness among working populations as well as  
55  
56  
57  
58  
59  
60

1  
2  
3 patient groups and consistently fares extremely well against other longer and  
4 multidimensional tools [7].

#### 6 Hospital anxiety and depression scale (HADS)

7 The HADS [8] is a 14-item measure of current anxiety (HADS-A) and depression (HADS-D).  
8 Caseness for anxiety or depression is revealed by subscores greater or equal to 11 on each  
9 subscale.  
10

#### 12 Epworth sleepiness scale (ESS)

13 In view of the association between excessive daytime sleepiness and fatigue, all subjects  
14 completed the ESS questionnaire (possible score range 0–24) [9]. This fully validated tool  
15 assesses daytime hypersomnolence, with a score  $\geq 10$  being indicative of significant  
16 hypersomnolence during the day.  
17

#### 20 COMPASS 31

21 Participants completed the Autonomic Symptom Profile [10] as a self-report measure of  
22 autonomic symptoms. However, scoring was performed according to the recently abbreviated  
23 and psychometrically improved version of this questionnaire, the Composite Autonomic  
24 Symptom Score 31 (COMPASS 31) [11]. Scoring consists of 31 items from six domains –  
25 orthostatic intolerance, vasomotor, secretomotor, gastrointestinal, bladder, pupillomotor –  
26 each weighted according to number of items and clinical relevance. Weighted individual  
27 domain scores are totalled to a maximum of 100, which indicates greater symptom load.  
28  
29

#### 33 **Assessment of quality of life**

34 Participants also completed the following quality of life measure:  
35

#### 37 Quality of life scale (QOLS)

38 The Quality of Life Scale (QOLS) used in this study has 16 items. The QOLS has been used  
39 in studies of healthy adults and patients with rheumatic diseases, fibromyalgia, chronic  
40 obstructive pulmonary disease, gastrointestinal disorders, cardiac disease, spinal cord injury,  
41 psoriasis, urinary stress incontinence, posttraumatic stress disorder, and diabetes.  
42

43 The QOLS is scored by adding up the score on each item to yield a total score for the  
44 instrument. Scores can range from 16 to 112. There is no automated administration or scoring  
45 software for the QOLS. Higher scores mediate better quality of life. The average total for  
46 healthy populations is approximately 90 [10-12].  
47

#### 51 **Functional assessment of the cardiac and autonomic nervous system**

#### 53 Apparatus

54 All participants underwent formal autonomic assessment in the Cardiovascular Laboratory, all  
55 measurements were performed with a dedicated high-tech device – Task Force Monitor  
56  
57  
58  
59



1  
2  
3 (TFM, CNSystems, Medizintechnik, Graz, Austria). The main area of TFM application is as  
4 an automated and computed beat-to-beat analysis of heart rate (electrocardiogram (ECG))  
5 oscillometric and non-invasive continuous blood pressure measurements (oscBP, contBP). On  
6 the basis of these biological signals source hemodynamic and autonomic parameters are  
7 calculated. The TFM facilitates continuous (beat-to-beat), reliable and reproducible  
8 measurements of all parameters [15-18]. Basic statistics (mean, median, min, max and SD) of  
9 all ameters were calculated automatically for defined periods.  
10  
11  
12  
13

#### 14 Protocol of autonomic assessment

15 All subjects were instructed to refrain from smoking, caffeine, alcohol ingestion, and  
16 intensive physical activity on the day of investigation and ate a light breakfast only. All  
17 investigations were performed at the same time of day, and took place in a neutral ambient  
18 temperature, quiet room [19,20].  
19  
20  
21

22 In all cases TFM measurements were performed during 10 minutes of supine rest (phase 1)  
23 and subsequently asked to standing (phase 2) during which changes in heart rate were  
24 assessed and where haemodynamic changes were consistent with recognized consensus  
25 criteria for a diagnosis of postural tachycardia syndrome made [21].  
26  
27  
28

#### 29 Assessment of heart rate and blood pressure variability

30 All cardiovascular assessments were carried out with continuous heart rate and beat-to-beat  
31 blood pressure measurement implemented in TFM. The integrity of the autonomic nervous  
32 system was assessed using a three-channel ECG and continuous blood pressure monitoring  
33 (contBP – with periodically cross-checked oscillometric BP measurements). TFM  
34 automatically provides a power spectral analysis for heart rate variability (HRV) and blood  
35 pressure variability (BPV). HRV and BPV spectral analysis is conducted using the adaptive  
36 autoregressive model (AAR) proposed by Bianchi et al. [22] In addition to total power  
37 spectral density (PSD), three frequency bands are calculated with TFM: VLF, LF and HF, but  
38 only two of these were taken account of as there were short-term autonomic regulations of HR  
39 and BP i.e. LF 0.05-0.17 Hz (low-frequency band) and HF 0.17-0.4 Hz (high frequency band)  
40 in absolute values, and both frequencies were also calculated in normalized units (LFnu-RRI,  
41 HFnu-RRI for heart rate variability and LFnu-sBP, HFnu-sBP, LFnu-dBP and HFnu-dBP for  
42 systolic and diastolic blood pressure variability). Using only HRV bands when considering  
43 autonomic regulation has some limitations, therefore TFM also provides spectral analysis of  
44 blood pressure variability, a more reliable tool for sympathetic and parasympathetic  
45 autoregulation assessment. For that purpose bands: LFnu-RRI, LF-RRI, LF-sBP, LFnu-sBP,  
46 LF-dBP and LFnu-dBP are referred to as sympathetic modulation of sinoatrial (SA) node and  
47  
48  
49  
50  
51  
52  
53  
54  
55  
56  
57  
58  
59  
60

1  
2  
3 vasomotor function. Whilst HF-RRI and HFnu-RRI bands refer to parasympathetic  
4 modulation of cardiovascular activity. Cardiovascular disturbances of the autonomic  
5 circulatory regulation cause alternations in spectra and proportion of frequencies in the total  
6 spectrum power. Parameters such as PSD, LF and HF are quantitative indicators of autonomic  
7 regulation and the ratio between LF and HF band represents the sympatho-vagal balance [23-  
8 25].

9  
10  
11  
12 We classified each individuals autonomic function profile into sympathetic or  
13 parasympathetic dominant according to their sympathetico-vagal balance during 10 minutes  
14 of supine rest. This was based upon previous studies and assessed using the LF/HF ratio  
15 which was considered to suggest a sympathetic dominant pattern if LF/HF was >1 and  
16 parasympathetic if the ratio was <1. [26, 27]

## 20 **RESULTS**

### 21 **Recruitment of the cohort – the prevalence of fatigue in a Polish population**

22  
23 During the media campaign 1400 individuals identified themselves to the research team as  
24 fitting, they believed, the criteria for CFS. 1308 of those subsequently were found not to meet  
25 the Fukuda criteria for chronic fatigue syndrome.

26  
27 In the 1308 (93%) individuals who identified themselves as fatigued, recognized chronic  
28 conditions were identified. These were conditions associated with the symptom of fatigue  
29 and therefore could have been the attributable cause for their fatigue symptoms (and therefore  
30 not consistent with the Fukuda diagnostic criteria). These fatigue associated conditions were  
31 broadly classified into conditions that were: neurological (n=280, 21.5%), neurodegenerative  
32 (n=200, 15%), psychiatric (n=654, 50%) and immunologic (n=174, 13.5%) disorders.

### 33 **Characteristics of a polish cohort of CFS patients meeting the Fukuda criteria**

34  
35 Of the total group with CFS, 41 were female (59.4%). The majority of individuals had a  
36 normal BMI (58%) with 24 (35%) being considered overweight and 3 (4.3%) being obese.  
37 Two individuals (2.9%) were considered underweight. The majority of individuals were  
38 considered to be of a specialist professional group (engineers).

### 39 **Symptom burden of a polish cohort of CFS patients meeting the Fukuda criteria**

40  
41 The majority of those with CFS had had symptoms for over 2 years with 37% having  
42 symptoms for 2-5 years and 21.7% having symptoms for more than 10 years. The vast  
43 majority described unrefreshing sleep with impaired short memory and concentration  
44 (91.3%), post-exertional malaise 89%, multi-joint pain without swelling or redness 72.5%,  
45 headaches 62.3%, muscle pain 66.7%, sore throat 39.1% and tender cervical or axillary lymph  
46 nodes 30.4%.

**Table 1** shows the prevalence of other symptoms identified in those found to have Fukuda CFS. This illustrates the fact that many clinical specialists may come into contact with individuals who may subsequently be identified as having chronic fatigue syndrome. When COMPASS 31 scores were considered these are shown in **Table 2** with 50% of individuals with CFS/ME having symptoms consistent with orthostatic intolerance. HAD scores were high for both anxiety and depression. 43/69 (62%) were found to have ESS scores  $\geq 10$  i.e. consistent with excessive daytime sleepiness. Considering scores from HADS A & D, 26/69 (38%) had scores consistent with significant anxiety and 22/69 (32%) depression.

### **Quality of life of a polish cohort of CFS patients meeting the Fukuda criteria**

Quality of life scores assessed using the QOLS were mean (SD) 64 (11). This confirmed that quality of life is significantly impaired in those with Fukuda criteria CFS and well below the expected for a healthy population. When we considered the relationship between quality of life and the other symptoms frequently seen in those with CFS, there were strong significant negative relationships between quality of life and fatigue ( $p < 0.0001$ ), anxiety ( $p = 0.0009$ ), depression ( $p < 0.0001$ ) and autonomic symptoms ( $p = 0.04$ ). There were no significant relationships between age or daytime sleepiness.

### **Autonomic function in a polish cohort of CFS patients meeting the Fukuda criteria**

When we classified the cohort according to predominance of sympathetic or parasympathetic function, 44/69 (64%) were found to be sympathetic predominant and 25 parasympathetic. When we considered symptom burden between these two phenotypes, there were no significant differences in symptoms or impact upon quality of life between the groups (**Table 3**). At rest, the sympathetic predominant group had significantly higher heart rate, ER and LF HRV and reduced LVET, PEP and HF HRV compared to the parasympathetic group. The total PSD was comparable between groups however sympatheticovagal balance was different between the phenotypes with increased LF BPV in both diastolic and systolic blood pressure, reduced baroreflex sensitivity in those with the sympathetic dominant phenotype (**Table 4**). Those with the parasympathetic predominant phenotype were more likely to have had the disease for between 5-10 years (**table 5**).

### **Prevalence of postural tachycardia syndrome in a Polish cohort of CFS patients**

The presence of postural tachycardia syndrome is frequently seen in those with CFS [28,29]. A total of 35 (51%) of the CFS group had haemodynamic responses to standing consistent with a diagnosis of PoTS. There was no difference in the proportion of those with PoTS in the sympathetic or parasympathetic groups (**Table 5**).

## **DISCUSSION**

1  
2  
3 This study has confirmed for the first time that fatigue is a common symptom experienced by  
4 the Polish population and that CFS is an under recognized syndrome in this group. When  
5 CFS is identified and studied, it is clear that, as in other European and US studies, it is a  
6 condition associated with a large symptom burden and impaired quality of life.  
7

8  
9 We believe that the numbers of patients we have identified in this cohort are a huge under  
10 estimate of the true prevalence of fatigue. We chose to publicise our project via radio and  
11 television adverts using both national and local media. The response was overwhelming and  
12 our initial plans to respond to by telephone proved to be impossible due to the sheer number  
13 of responses. We therefore were forced to change our identification strategy to invite  
14 respondents to self present via email, then being directed to a web portal. We believe  
15 therefore that our findings represent a significant under estimate of fatigue and its impact in  
16 Poland and would suggest that formal epidemiological studies are required.  
17

18  
19 Our study confirms that fatigue is very common in a Polish population but that this is  
20 frequently related to other conditions rather than to chronic fatigue syndrome. Of the cohort of  
21 1400 who self-presented with fatigue only 69 subsequently were confirmed as having CFS  
22 using the Fukuda criteria. This suggests that in Poland there is significant amounts of fatigue  
23 related to other conditions, with only a small percentage of those experiencing fatigue having  
24 chronic fatigue syndrome (69/1400; 5%).  
25

26  
27 From the initial responses, we rigorously identified those who met with Fukuda criteria for  
28 CFS. We did this by asking individuals to complete the tool, but also using face to face  
29 sessions with trained clinicians. We believe therefore, that our cohort represents a well  
30 characterized group who we are confident fulfil one of the recognised diagnostic criteria for  
31 CFS. When we compared this Polish cohort with CFS to other national cohorts there were  
32 some similarities, but also some differences.  
33

34  
35 Compared to the UK cohort [30] with in excess of 6500 individuals collected from the UK  
36 NHS Clinical CFS services, the Polish cohort appeared to be of a similar age to the UK cohort  
37 with comparable levels of fatigue and illness duration, have similar levels of sleep and  
38 cognitive symptoms but less post exertional malaise, muscle pain and headaches. The Polish  
39 cohort appeared to have more males than was seen in the UK cohort.  
40

41  
42 These differences might arise because of the self report nature of the Polish cohort and that  
43 the UK cohort was recruited from the national health service clinical services which were  
44 specifically set up to identify and manage CFS [3]. A comprehensive review of the  
45 prevalence of CFS/ME in three regions of England involving 143000 subjects suggested an  
46 older cohort with longer disease duration than that seen in the UK clinical services  
47  
48  
49  
50  
51  
52  
53  
54  
55  
56  
57  
58  
59  
60

1  
2  
3 An Australian cohort [31] was established using similar identification strategies to our Polish  
4 cohort with self-report in response to adverts inviting individuals to participate in a research  
5 database. Individuals in this cohort were included if they had received the diagnosis from a  
6 primary care physician. Again the proportion of females in the Australian cohort was higher  
7 than in the Polish cohort  
8  
9

10 As in previous national cohorts [3, 30, 31], the presence of fatigue in the Polish population  
11 was associated with impaired quality of life. As has been seen previously impaired quality of  
12 life associates with the severity of symptoms such as fatigue and autonomic dysfunction, but  
13 in contrast to other studies not daytime sleepiness. Impaired quality of life is also associated  
14 with increased anxiety and more depression. As in other series, we would suggest that this  
15 association is a secondary phenomena i.e. arising as a consequence of the condition rather  
16 than a cause. The fact that we rigorously excluded depression and psychiatric disorders when  
17 determining the criteria would be consistent with this.  
18  
19

20 Our study has also confirmed a high prevalence of the condition postural tachycardia  
21 syndrome (PoTS). This form of dysautonomia [21] has been recognized as occurring  
22 frequently in those with CFS [28,29], and represents a potential therapeutic target in those  
23 with CFS. It is important that clinicians and researchers are aware of the overlap and trained  
24 to identify and manage this condition.  
25  
26

27 This study has a number of limitations. The case ascertainment process used self report as the  
28 means of identifying those with CFS. It became clear during the radio and television  
29 campaign that there was considerable interest, and as a result our recruitment process needed  
30 to be changed to facilitate timely screening of those self presenting with fatigue. It is clear  
31 that a thorough, methodologically robust epidemiological study of fatigue and its  
32 consequences in a Polish population are now needed.  
33  
34

35 Our study has confirmed that fatigue is a common and under recognised symptom affecting  
36 the Polish population. It impacts upon quality of life and is associated with a range of other  
37 symptoms that have been previously recognised in other cohort studies. Despite this, there  
38 are no clinical services for fatigue or CFS in Poland and it is poorly understood and  
39 infrequently diagnosed. Our research programme now aims to consider the effect of  
40 interventions upon fatigue in a Polish CFS population.  
41  
42

43 Contributorships: JS and PZ were involved in writing of the manuscript. JS, PZ, JJK and MTF  
44 conceived and supervised the study. SK provided statistical advice. JS, PZ, JN contributed  
45  
46  
47  
48  
49  
50  
51  
52

conceived, designed and performed the experiments, collected and analyzed the data, revising it critically for important intellectual content and final approval of the version to be submitted.

Competing interests: none declared.

Funding: none

data sharing: no additional data are available.

## REFERENCES

1. Chronic Fatigue Syndrome/Myalgic Encephalomyelitis (encephalopathy); diagnosis and management. [www.nice.gov.org](http://www.nice.gov.org)
2. Institute of Medicine. Beyond Myalgic Encephalomyelitis/Chronic Fatigue Syndrome Redefining an Illness Committee on the Diagnostic Criteria for Myalgic Encephalomyelitis/Chronic Fatigue Syndrome; Board on the Health of Select Populations; Institute of Medicine. Washington (DC): National Academies Press (US); 2015 Feb 10. ISBN-13: 978-0-309-31689-7 ISBN-10: 0-309-31689-8
3. Nacul LC, Lacerda EM, Pheby D, Champion P, Molokhia M, Fayyaz S, Leite JCDC, Poland F, Howe A, Drachler ML. Prevalence of myalgic encephalomyelitis/chronic fatigue syndrome (ME/CFS) in three regions of England: a repeated cross sectional study in primary care. *BMC Medicine* 2011;9:91.
4. Fukuda K, Straus SE, Hickie I, Sharpe MC, Dobbins JG, Komaroff A, International Chronic Fatigue Syndrome Study Group. The Chronic Fatigue Syndrome: A Comprehensive Approach to Its Definition and Study. *Annals of Int Med.* 1994;121:953-959.
5. Chalder T, Berelowitz G, Pawlikowska T, Watts L, Wessely S, Wright D, et al. (1993) Development of a fatigue scale. *Journal of Psychosomatic Research*,37: 147-53.
6. Morriss RK Wearden AJ Mullis R . Exploring the validity of the Chalder Fatigue Scale in chronic fatigue syndrome. *J Psychosom Res* 1998;45:411–417.
7. De Vries J Michielsen HJ Van Heck GL . Assessment of fatigue among working people: a comparison of six questionnaires. *Occup Environ Med* 2003;60(Suppl. 1):i10–i15.
8. Zigmond, A. S., & Snaith, R.P. (1983). The Hospital Anxiety And Depression Scale, *Acta Psychiatrica Scandinavica*, 67, 361-370.
9. Johns MW. A new method for measuring daytime sleepiness: the Epworth sleepiness scale. *Sleep.* 1991 Dec;14(6):540-5.
10. Suarez et al., *Neurology*, 1999, 52(3):523-528

11. David M. Sletten,<sup>a</sup> Guillermo A. Suarez,<sup>†,a</sup> Phillip A. Low,<sup>a</sup> Jay Mandrekar,<sup>b</sup> and Wolfgang Singer<sup>a</sup> COMPASS 31: A Refined and Abbreviated Composite Autonomic Symptom Score. *Mayo Clin Proc.* 2012 Dec; 87(12): 1196–1201.
12. Burckhardt CS, Woods SL, Schultz AA, Ziebarth DM (1989). Quality of life of adults with chronic illness: A psychometric study. *Research in Nursing and Health*, 12, 347-354.
13. Burckhardt, CS, Clark SR, Bennett RM (1993). Fibromyalgia and quality of life: A comparative analysis. *Journal of Rheumatology*, 20, 475-479. Flanagan JC (1978). A research approach to improving our quality of life. *American Psychologist*, 33, 138-147.
14. Flanagan JC (1982). Measurement of quality of life: Current state of the art. *Archives of Physical Medicine and Rehabilitation*, 63, 56-59.
15. Fortin J, Habenbacher W, Gruellenberger R, Wach P, Skrabal F. Real time monitor for hemodynamic beat-to-beat parameters and power spectra analysis of biosignals. *Proceedings of the 20th annual International Conference of the IEEE Engineering in Medicine and Biology Society*; 1998 29 Oct-1 Nov; Hong Kong.
16. Fortin J, Klinger Th, Wagner Ch, Sterner H, Madritsch Ch, Grüllenberger R. et al. The Task Force Monitor—a non-invasive beat-to-beat monitor for hemodynamic and autonomic function of the human body. *Proceedings of the 20th annual International Conference of the IEEE Engineering in Medicine and Biology Society*; 1998 29 Oct-1 Nov; Hong Kong.
17. Fortin J, Marte W, Grullenberger R. Continuous non-invasive blood pressure monitoring using concentrically interlocking control loops. *Comput Biol Med* 2006; 36:941-57.
18. Parati G, Ongaro G, Bilo G, Glavina F, Castiglioni P, Di Renzo M. et al. Non-invasive beat-to-beat blood pressure monitoring: new developments. *Blood Press Monit* 2003; 8:31-6.
19. Special article. Assessment: Clinical autonomic testing report of the therapeutics and technology subcommittee of the American Academy of Neurology. *Neurology* 1996;46:873-880.
20. Low PA, Benarroch EE. *Clinical autonomic disorders*. Philadelphia: Lippincott Williams and Wilkins; 1997.
21. Sheldon RS, Grubb BP, Olshansky B, Shen W, Calkins H, Brignole M, Raj SR, Krahn AD, Morillo CA, Stewart JM, Sutton R, Sandroni P, Friday KJ et al., Heart Rhythm Society Expert Consensus Statement on the Diagnosis and Treatment of Postural Tachycardia Syndrome, Inappropriate Sinus Tachycardia, and Vasovagal Syncope. *Heart Rhythm* 2015; 12: e41-e63 <https://doi.org/10.1016/j.hrthm.2015.03.029>

- 1  
2  
3 22. Bianchi AM, Mainardi LT, Meloni C, Chierchia S, Cerutti S. Continuous monitoring of  
4 the sympatho-vagal balance through spectral analysis. *IEEE Eng Med Biol Mag* 1997;16:64-  
5 73.
- 6  
7 23. Taskforce of the European Society of Cardiology and the North American Society of  
8 Pacing and Electrophysiology. Heart rate variability: Standards of measurement,  
9 physiological interpretation, and clinical use. *Eur Heart J* 1996;17:354-81.
- 10  
11 24. Stauss HM. Heart rate variability. *Am J Physiol Integr Comp Physiol* 2003;285:R927-31.
- 12  
13 25. Akselrod S, Gordon D, Madwed JB, Sanidman NC, Shannon DC, Cohen RJ.  
14 Hemodynamic regulation: investigation by spectral analysis. *Am J Physiol* 1985; 249:H867-  
15 75.
- 16  
17 26. Eckberg DL. Sympathovagal Balance. A critical appraisal.
- 18  
19 27. Malliani A, Pagani M, Montana N, Mela GC. Sympathovagal Balance. A reappraisal.  
20 *Circulation* 1998;98:2640-2643.
- 21  
22 28. A Hoad, G Spickett , J Elliott , J Newton. Postural Orthostatic Tachycardia Syndrome Is  
23 an Under-Recognized Condition in Chronic Fatigue Syndrome. *QJM* 101 (12), 961-965.  
24 2008 Sep 19
- 25  
26 29. G K Reynolds 1 , D P Lewis , A M Richardson , B A Lidbury. Comorbidity of Postural  
27 Orthostatic Tachycardia Syndrome and Chronic Fatigue Syndrome in an Australian Cohort. *J*  
28 *Intern Med* 275 (4), 409-417. 2013 Nov 29.
- 29  
30 30. Collin S, Nuevo R, van de Putte EM, Nijhof SL, Crawley E. Chronic Fatigue Syndrome  
31 (CFS) or Myalgic encephalomyelitis (ME) is different in children compared to in adults: a  
32 study of UK and Dutch clinical cohorts. *BMJ Open* 2015;5:e008830
- 33  
34 31. Johnston SC, Staines DR, Marshall-Gradisnik SM. Epidemiological characteristics of  
35 chronic fatigue syndrome/myalgic encephalomyelitis in Australian patients. *Clinical*  
36 *Epidemiology* 2016;8:97-107.
- 37  
38  
39  
40  
41  
42  
43  
44  
45  
46  
47  
48  
49  
50  
51  
52  
53  
54  
55  
56  
57  
58  
59  
60



**TABLE 1: OTHER SYMPTOMS REPORTED AT INITIAL ASSESSMENT, N=69**

| Specific symptom                                       | No | %    |
|--------------------------------------------------------|----|------|
| IBS                                                    | 12 | 17.7 |
| Migraine                                               | 17 | 24.6 |
| seasonal allergy                                       | 8  | 11.6 |
| slight food intolerance / nausea / alcohol intolerance | 40 | 58.1 |
| back pain                                              | 13 | 18.8 |
| Tinnitus                                               | 9  | 13.0 |
| palpitations with no cardiac history                   | 9  | 13.0 |
| periodical fever                                       | 8  | 11.6 |
| sensory disturbances                                   | 0  | 0    |
| chest symptoms with no medical history                 | 15 | 21.7 |
| mood fluctuations                                      | 30 | 43.5 |
| chronic stress                                         | 41 | 59.4 |
| overworked / work stress                               | 34 | 49.3 |
| shift work                                             | 0  | 0    |
| care work                                              | 3  | 4.3  |
| newborn care                                           | 7  | 10.1 |
| frequent infections                                    | 9  | 13.0 |
| night hyperhidrosis                                    | 22 | 31.9 |
| sleep disturbance / hypersomnia                        | 28 | 40.6 |
| unexplained anxiety                                    | 3  | 4.3  |
| sensory disturbance                                    | 10 | 14.5 |

review only

**TABLE 2: COMPASS 31 - AUTONOMIC SYMPTOMS, N=69**

| <b>Specific symptom</b>      | <b>No</b> | <b>%</b> |
|------------------------------|-----------|----------|
| orthostatic intolerance      | 40        | 50.0     |
| dizziness / headaches        | 41        | 59.4     |
| sudden paleness              | 25        | 36.2     |
| arrhythmia                   | 29        | 42.0     |
| dryness eyes mouth           | 45        | 65.2     |
| vasomotor                    | 24        | 34.8     |
| secretomotor                 | 30        | 43.5     |
| upper gastro. tract symptoms | 38        | 55.1     |
| unknown gastro. pain         | 26        | 37.7     |
| constipation                 | 21        | 30.4     |
| diarrhea                     | 28        | 40.6     |
| urinary                      | 21        | 30.4     |
| sexual failure               | 19        | 27.5     |
| sleep                        | 68        | 98.5     |
| pupilmotor                   | 28        | 40.6     |
| anxiety                      | 34        | 49.3     |

**TABLE 3: BASELINE QUALITY OF LIFE SCORES, N=69**

| Variable                  | Total Group |      | Sympathetic dominant (n=44) |      | parasympathetic dominant (n=25) |      |        |
|---------------------------|-------------|------|-----------------------------|------|---------------------------------|------|--------|
|                           | Mean        | SD   | Mean                        | SD   | Mean                            | SD   |        |
| Chalder Fatigue Scale     | 25.3        | 3.7  | 25.5                        | 3.8  | 25.0                            | 3.8  | p>0.05 |
| Fatigue Severity Scale    | 48.8        | 8.7  | 48.0                        | 8.5  | 50.2                            | 9.1  | p>0.05 |
| Fatigue Impact Scale      | 92.2        | 26.2 | 92.6                        | 24.6 | 91.6                            | 29.2 | p>0.05 |
| HADS_A                    | 9.6         | 3.4  | 9.3                         | 3.1  | 10.1                            | 3.9  | p>0.05 |
| HADS_D                    | 8.5         | 3.1  | 8.5                         | 3.0  | 8.6                             | 3.4  | p>0.05 |
| BDI                       | 17.6        | 8.1  | 18.3                        | 8.3  | 16.4                            | 7.9  | p>0.05 |
| Epworth Sleepiness Scale  | 10.3        | 5.6  | 10.6                        | 5.3  | 9.8                             | 6.2  | p>0.05 |
| Quality of Life Scale     | 63.5        | 10.9 | 62.1                        | 11.9 | 65.9                            | 8.8  | p>0.05 |
| Orthostatic Grading Scale | 8.4         | 3.1  | 3.5                         | 3.4  | 3.4                             | 2.5  | p>0.05 |

review only

**TABLE 4 CARDIOVASCULAR / AUTONOMIC PARAMETERS**

|                                             | Variable                 | Total group (n=69) |        | Sympathetic dominant (n=44) |        | parasympathetic dominant (n=25) |        |               |
|---------------------------------------------|--------------------------|--------------------|--------|-----------------------------|--------|---------------------------------|--------|---------------|
|                                             |                          | Mean               | SD     | Mean                        | SD     | Mean                            | SD     |               |
| <b>Haemodynamics</b>                        | <b>HR</b>                | 67.6               | 9.2    | 70.1                        | 8.4    | 63.2                            | 9.0    | <b>0.0017</b> |
|                                             | <b>Sbp</b>               | 117.3              | 13.3   | 118.5                       | 11.3   | 115.2                           | 16.2   | p>0.05        |
|                                             | <b>Dbp</b>               | 79.3               | 10.6   | 79.6                        | 9.7    | 78.8                            | 12.1   | p>0.05        |
|                                             | <b>mBP</b>               | 95.9               | 11.1   | 96.0                        | 9.9    | 95.7                            | 13.2   | p>0.05        |
| <b>Cardiac Impedance</b>                    | <b>SI</b>                | 52.3               | 12.4   | 50.8                        | 12.5   | 54.9                            | 12.1   | p>0.05        |
|                                             | <b>CI</b>                | 3.5                | 0.8    | 3.5                         | 0.8    | 3.4                             | 0.8    | p>0.05        |
|                                             | <b>TPRI</b>              | 2304.7             | 747.3  | 2285.2                      | 684.3  | 2339.0                          | 861.1  | p>0.05        |
|                                             | <b>EDI</b>               | 85.0               | 19.9   | 82.3                        | 19.9   | 89.7                            | 19.5   | p>0.05        |
|                                             | <b>IC</b>                | 62.8               | 21.2   | 59.7                        | 20.6   | 68.2                            | 21.5   | p>0.05        |
|                                             | <b>ACI</b>               | 85.7               | 34.4   | 80.4                        | 33.8   | 95.0                            | 34.3   | p>0.05        |
|                                             | <b>LVWI</b>              | 4.4                | 1.1    | 4.5                         | 1.1    | 4.4                             | 1.2    | p>0.05        |
|                                             | <b>LVET</b>              | 318.2              | 17.3   | 313.2                       | 18.2   | 327.0                           | 11.1   | <b>0.0005</b> |
|                                             | <b>TFC</b>               | 31.3               | 4.5    | 30.8                        | 4.7    | 32.3                            | 4.0    | p>0.05        |
|                                             | <b>PEP</b>               | 110.2              | 12.1   | 107.1                       | 11.3   | 115.7                           | 11.6   | <b>0.0040</b> |
|                                             | <b>STR</b>               | 34.9               | 4.3    | 34.6                        | 4.7    | 35.5                            | 3.4    | p>0.05        |
|                                             | <b>ER</b>                | 35.5               | 3.3    | 36.3                        | 2.6    | 34.2                            | 3.9    | <b>0.0092</b> |
|                                             | <b>MSER</b>              | 300.8              | 68.9   | 306.2                       | 72.5   | 291.4                           | 62.4   | p>0.05        |
|                                             | <b>REP</b>               | 77.8               | 16.8   | 79.7                        | 19.8   | 74.5                            | 9.1    | p>0.05        |
|                                             | <b>HI</b>                | 0.3                | 0.1    | 0.3                         | 0.1    | 0.4                             | 0.1    | p>0.05        |
| <b>RZ</b>                                   | 187.1                    | 12.2               | 185.3  | 11.1                        | 190.4  | 13.6                            | p>0.05 |               |
| <b>TAC</b>                                  | 2.6                      | 0.7                | 2.5    | 0.7                         | 2.8    | 0.8                             | p>0.05 |               |
| <b>Heart rate variability</b>               | <b>LFnu-RRI</b>          | 54.2               | 17.2   | 62.2                        | 14.0   | 40.1                            | 12.7   | <b>0.0000</b> |
|                                             | <b>HFnu-RRI</b>          | 45.8               | 17.2   | 37.8                        | 14.0   | 59.9                            | 12.7   | <b>0.0000</b> |
|                                             | <b>PSD-RRI</b>           | 1684.1             | 1993.7 | 1604.9                      | 2166.9 | 1823.4                          | 1678.7 | p>0.05        |
|                                             | <b>LF/HF-RRI</b>         | 1.7                | 1.6    | 2.3                         | 1.8    | 0.8                             | 0.4    | <b>0.0000</b> |
| <b>Diastolic Blood pressure variability</b> | <b>LFnu-Dbp</b>          | 52.2               | 14.7   | 59.7                        | 10.2   | 38.9                            | 11.7   | <b>0.0000</b> |
|                                             | <b>HFnu-dBP</b>          | 14.0               | 10.4   | 11.0                        | 7.5    | 19.3                            | 12.7   | <b>0.0004</b> |
|                                             | <b>PSD-dBP</b>           | 13.6               | 16.5   | 15.2                        | 19.3   | 10.8                            | 9.5    | p>0.05        |
|                                             | <b>LF/HF-dBP</b>         | 6.6                | 6.2    | 8.7                         | 6.8    | 2.8                             | 1.8    | <b>0.0000</b> |
| <b>Systolic Blood pressure variability</b>  | <b>LFnu-sBP</b>          | 42.1               | 13.5   | 47.5                        | 10.7   | 32.6                            | 12.9   | <b>0.0000</b> |
|                                             | <b>HFnu-sBP</b>          | 16.5               | 10.8   | 15.6                        | 11.0   | 18.2                            | 10.4   | p>0.05        |
|                                             | <b>PSD-sBP</b>           | 20.2               | 30.2   | 17.5                        | 16.3   | 25.0                            | 45.5   | p>0.05        |
|                                             | <b>LF/HF-sBP</b>         | 3.8                | 2.8    | 4.5                         | 3.0    | 2.5                             | 1.7    | <b>0.0019</b> |
| <b>Baroreflex parameters</b>                | <b>Total Event Count</b> | 17.4               | 13.6   | 21.5                        | 14.4   | 10.2                            | 8.4    | <b>0.0006</b> |
|                                             | <b>Total Slope Mean</b>  | 19.6               | 13.0   | 16.7                        | 8.9    | 24.8                            | 17.2   | <b>0.0114</b> |
|                                             | <b>Total BEI</b>         | 70.5               | 15.1   | 72.4                        | 14.2   | 67.0                            | 16.4   | p>0.05        |

**TABLE 5: POTS (SYMPATHETIC, N=44; PARASYMPATHETIC, N=25)**

|                                            | sympathetic dominant |      | parasympathetic dominant |      | p      |
|--------------------------------------------|----------------------|------|--------------------------|------|--------|
|                                            | No                   | %    | No                       | %    |        |
| <b>PoTS</b>                                | 22                   | 45.5 | 12                       | 48   | p>0.05 |
| <b>Fatigue period</b><br>6 month - 2 years | 8                    | 22.9 | 8                        | 23.5 | p>0.05 |
| 2-5 years                                  | 14                   | 40.0 | 12                       | 35.3 | p>0.05 |
| 5-10 years                                 | 4                    | 11.4 | 8                        | 23.5 | 0.0492 |
| more than 10 years                         | 9                    | 25.7 | 6                        | 17.6 | p>0.05 |
| <b>Fatigue period IQR</b>                  | 2-5 years            |      | 6 month - 2 years        |      |        |
| <b>Fatigue period in years IQR</b>         | 8                    |      | 2.5                      |      |        |

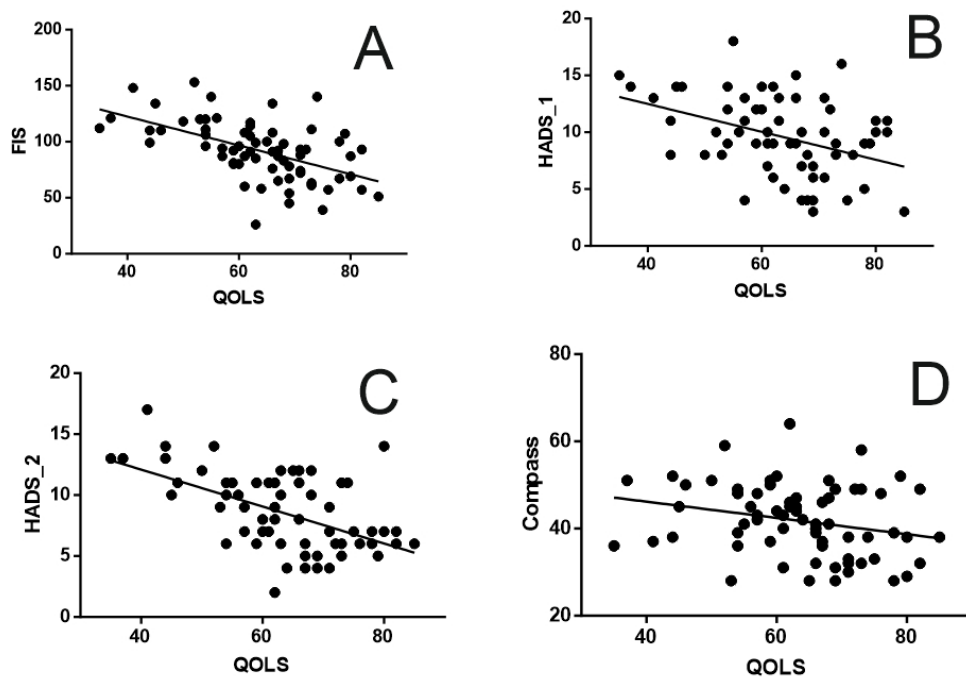

Figure 2: The relationship between quality of life measured using the QOLS scale and a) fatigue severity assessed using the fatigue impact scale b) anxiety measured using the HADS Anxiety scale (HADS -1 ) c) depression measured using the HADS Depression Scale (HADS - 2) and d) autonomic symptom burden measured using the COMPASS 31

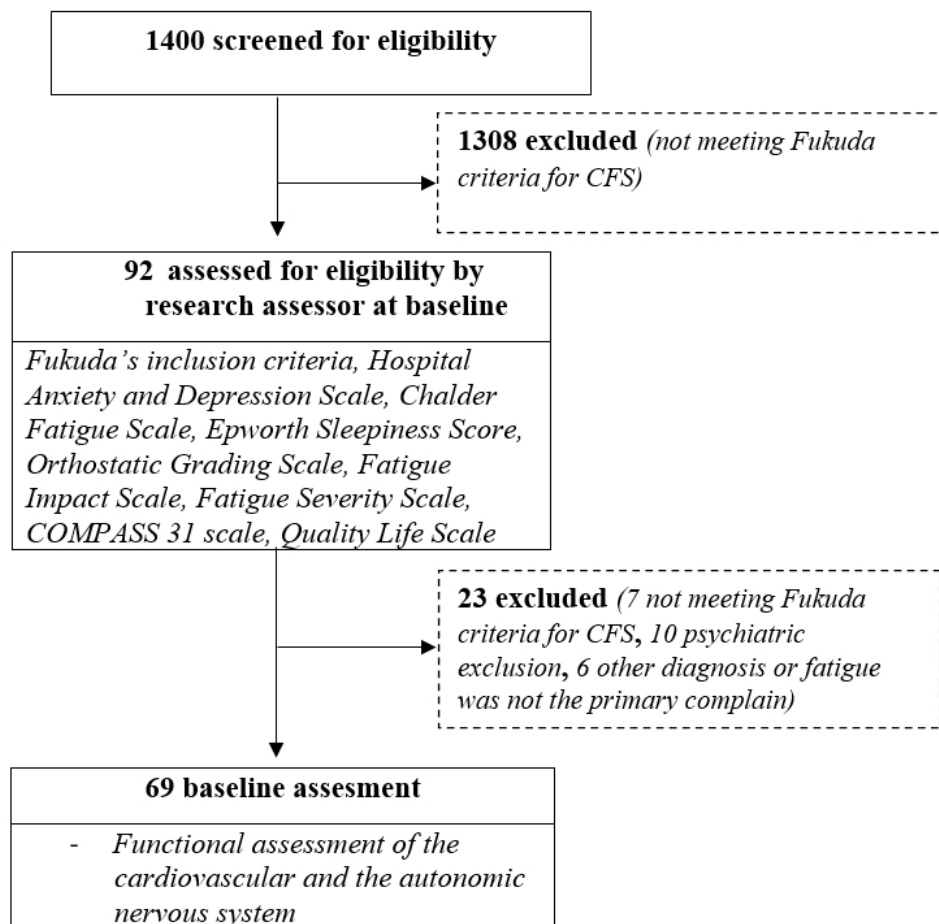

Figure 1: Study protocol

# BMJ Open

**Chronic fatigue syndrome/Myalgic encephalomyelitis (CFS/ME) is common in Poland and associated with significant symptoms and impairment in quality of life – a cross sectional study of the prevalence of CFS/ME in Polish population**

|                                 |                                                                                                                                                                                                                                                                                                                                                                                                                                                                                                                                                                                                                                                                                                                                 |
|---------------------------------|---------------------------------------------------------------------------------------------------------------------------------------------------------------------------------------------------------------------------------------------------------------------------------------------------------------------------------------------------------------------------------------------------------------------------------------------------------------------------------------------------------------------------------------------------------------------------------------------------------------------------------------------------------------------------------------------------------------------------------|
| Journal:                        | <i>BMJ Open</i>                                                                                                                                                                                                                                                                                                                                                                                                                                                                                                                                                                                                                                                                                                                 |
| Manuscript ID                   | bmjopen-2018-023955.R1                                                                                                                                                                                                                                                                                                                                                                                                                                                                                                                                                                                                                                                                                                          |
| Article Type:                   | Research                                                                                                                                                                                                                                                                                                                                                                                                                                                                                                                                                                                                                                                                                                                        |
| Date Submitted by the Author:   | 12-Nov-2018                                                                                                                                                                                                                                                                                                                                                                                                                                                                                                                                                                                                                                                                                                                     |
| Complete List of Authors:       | Slomko, Joanna; Uniwersytet Mikolaja Kopernika Collegium Medicum, Department of Hygiene, Epidemiology and Ergonomy<br>Newton, Julia; Newcastle University , Institute of Cellular Medicine<br>Kujawski, Sławomir; Uniwersytet Mikolaja Kopernika Collegium Medicum, Department of Hygiene, Epidemiology and Ergonomy<br>Tafil-Klawe, Małgorzata; Uniwersytet Mikolaja Kopernika Collegium Medicum, Department of Human Physiology,<br>Klawe, Jacek; Collegium Medicum in Bydgoszcz, Nicolaus Coprenicus University in Torun<br>Staines, Donald; Griffith University, Medical Sciences<br>Marshall-Gradisnik, Sonya; Griffith University, Medical Sciences<br>Zalewski, Pawel; Uniwersytet Mikolaja Kopernika Collegium Medicum, |
| <b>Primary Subject Heading</b>: | Public health                                                                                                                                                                                                                                                                                                                                                                                                                                                                                                                                                                                                                                                                                                                   |
| Secondary Subject Heading:      | Epidemiology, General practice / Family practice                                                                                                                                                                                                                                                                                                                                                                                                                                                                                                                                                                                                                                                                                |
| Keywords:                       | EPIDEMIOLOGY, quality of life, prevalence, chronic fatigue                                                                                                                                                                                                                                                                                                                                                                                                                                                                                                                                                                                                                                                                      |
|                                 |                                                                                                                                                                                                                                                                                                                                                                                                                                                                                                                                                                                                                                                                                                                                 |

SCHOLARONE™  
Manuscripts



1  
2  
3 **Chronic fatigue syndrome/Myalgic encephalomyelitis (CFS/ME) is common in Poland**  
4 **and associated with significant symptoms and impairment in quality of life – a cross**  
5 **sectional study of the prevalence of CFS/ME in Polish population**  
6  
7  
8

9 Joanna Słomko<sup>1</sup>, Julia L. Newton<sup>2</sup>, Sławomir Kujawski<sup>1</sup>, Małgorzata Tafil-Klawe<sup>3</sup>, Jacek J.  
10 Klawe<sup>1</sup>, Donald Staines<sup>4</sup>, Sonya Marshall-Gradisnik<sup>4</sup>, Paweł Zalewski<sup>1</sup>  
11  
12  
13  
14  
15

16 <sup>1</sup> Department of Hygiene, Epidemiology and Ergonomy, Faculty of Health Sciences Ludwik  
17 Rydygier Collegium Medicum in Bydgoszcz Nicolaus Copernicus University in Torun, M.  
18 Skłodowskiej-Curie 9, Bydgoszcz 85-094, Poland  
19

20 <sup>2</sup> Institute of Cellular Medicine, The Medical School, Newcastle University, Framlington Place  
21 Newcastle-upon-Tyne NE2 4HH  
22

23 <sup>3</sup> Department of Human Physiology, Faculty of Medicine Ludwik Rydygier Collegium  
24 Medicum in Bydgoszcz Nicolaus Copernicus University in Torun, Ludwik Rydygier Collegium  
25 Medicum in Bydgoszcz, Karłowicza 24, Bydgoszcz 85-092, Poland  
26  
27

28 <sup>4</sup> The National Centre for Neuroimmunology and Emerging Diseases, Menzies Health Institute  
29 Queensland, Griffith University, Gold Coast, QLD, Australia.  
30  
31  
32  
33  
34  
35  
36  
37  
38  
39

40 Corresponding author:

41 Paweł Zalewski

42 Department of Hygiene, Epidemiology and Ergonomics,

43 Nicolaus Copernicus University in Torun,

44 M. Skłodowskiej-Curie 9, 85-094

45 Bydgoszcz,

46 Poland;

47 tel. +48 52 585-36-16;

48 E-mail: p.zalewski@cm.umk.pl  
49  
50  
51  
52  
53  
54  
55  
56  
57  
58  
59  
60

## Abstract

**Objectives:** The aim of this study was to estimate the prevalence of chronic fatigue syndrome/myalgic encephalomyelitis (CFS/ME) and describe illness characteristics in a community population in Poland. Design: cross-sectional study

Setting: Poland

Participants: Of the cohort of 1400 who self-presented with fatigue only 69 subsequently were confirmed as having CFS/ME using the Fukuda criteria.

Main outcome measures: Participants completed the following screening symptom assessment tools: Chalder fatigue scale, Hospital anxiety and depression scale (HADS), Epworth sleepiness scale (ESS), COMPASS 31, Quality of life scale (QOLS). Hemodynamic and autonomic parameters were automatically measured at rest with a Task Force Monitor.

**Results:** In 1308 from 1400 (93%) individuals who identified themselves as fatigued, recognized chronic conditions were identified e.g. neurological (n=280, 21.5%), neurodegenerative (n=200, 15%), psychiatric (n=654, 50%) and immunologic (n=174, 13.5%) disorders. The remaining 69 participants (mean age 38.3±8.5) met the Fukuda definition for CFS/ME and had baseline objective assessment. The majority had experienced symptoms for over 2 years with 37% having symptoms for 2-5 years and 21.7% for more than 10 years. The Composite Autonomic Symptom Score 31 (COMPASS 31) indicated that 50% have symptoms consistent with orthostatic intolerance. 43/69 (62%) had Epworth sleepiness scores  $\geq 10$  i.e. consistent with excessive daytime sleepiness, 26/69 (38%) had significant anxiety and 22/69 (32%) depression measured by HADS A & D. Quality of life is significantly impaired in those with Fukuda criteria CFS (QLS score 64±11) with significant negative relationships between quality of life and fatigue ( $p < 0.0001$ ), anxiety ( $p = 0.0009$ ), depression ( $p < 0.0001$ ) and autonomic symptoms ( $p = 0.04$ ).

**Conclusion:** This is the first study to summarize illness characteristics of Polish CFS/ME patients. Our study has confirmed that fatigue is a common and under-recognised symptom affecting the Polish population.

**Key words:** chronic fatigue, epidemiology, prevalence, quality of life

Strengths and limitations of this study

- This is the first study to summarize illness characteristics of a cohort of Polish CFS/ME patients.

- We used Fukuda criteria to indicate patients with CFS/ME. An identified cohort was examined in a comprehensive manner.
- The main potential limitation could be the manner in which patients were identified. However the alternative approach of identification through primary care may have yielded very few patients, because there is little recognition of the chronic fatigue syndrome in Poland.
- Methodologically more robust epidemiological studies of fatigue and its consequences in the Polish population are now needed.

For peer review only

## Introduction

Diagnostics and treatment of the Chronic Fatigue Syndrome/Myalgic encephalomyelitis (CFS/ME) present a challenge to specialists as this syndrome is not a clearly identified, uniform disease but a set of symptoms resembling those occurring in other diseases, in which a sense of chronic fatigue predominates. In some countries (e.g Poland), CFS/ME is diagnosed very rarely, which may be associated with the fact that the aetiology of the disease is still poorly known, and with diagnostic problems resulting from a lack of detailed and uniform guidelines allowing an unambiguous diagnosis and initiation of effective treatment in CFS/ME patients.

The available studies provide several diagnostic criteria based on a definition of the American Centers for Disease Control (CDC), the Oxford Criteria, or the Canadian Guidelines. Criteria proposed by CDC (Fukuda et al. 1994) are most commonly used as acceptable diagnostic criteria when recruiting CFS/ME patients for scientific studies. However, they are encumbered by several disadvantages (e.g. fatigue experienced for at least 6 months), which – from the point of view of clinical practice – may delay a diagnosis in patients who do not meet this criterion precisely. The Oxford criteria propose a new diagnostic approach, focusing mainly on an aspect of mental rather than somatic fatigue. The Canadian criteria (CDC) expand the CFS/ME definition with additional diagnostic criteria, i.e. post-exertional malaise and presence of neurological, endocrine, cognitive and autonomic (orthostatic intolerance) disorders. The proposed CFS/ME definition, including malaise and symptoms exacerbation after exercise, allows differentiating CFS/ME patients from patients with depression or fibromyalgia. Alternative criteria, such as the International Consensus Criteria (ICC), disclose a further range of symptoms pertaining to the neurological, immunological, gastrointestinal, and autonomic systems.

Its global prevalence, ranging between 0.4% and 2.5%, is growing; most commonly, it is observed in the group of 20–40-year-olds, more frequently in professionally active women. CFS/ME is considered to be a common condition in countries such as the UK, Australia and the US [1,2]. In the UK, it affects up to 250,000 individuals with frequencies reported of up to 0.2% [3]. In the UK, Fukuda-defined cases have a prevalence of 0.2%. In the US, the prevalence of Fukuda-defined cases has been reported between 0.2% and 0.4%. Finding from the Australian cohort showed that from 535 patients diagnosed with CFS/ME by a primary care physician, 30.28% met Fukuda criteria. To date CFS/ME has not been reported in Poland, nor its prevalence defined. There are currently no CFS/ME Clinical services.

1  
2  
3 The aim of this study was to summarize sociodemographic and illness characteristics in those  
4 reporting CFS/ME symptoms in a Polish population. We set out to define the presence and  
5 characteristics of CFS/ME in Poland in order to identify a cohort of those patients who could  
6 potentially participate in further research studies.  
7  
8  
9

## 10 **METHODS**

### 11 **Setting**

12  
13  
14 This study took place from March 2014 till July 2016 and was approved by the Ethics  
15 Committee, Ludwik Rydygier Memorial Collegium Medicum in Bydgoszcz, Nicolaus  
16 Copernicus University, Toruń. Written informed consent was obtained from all of the  
17 participants.  
18  
19

### 20 **Participants**

21  
22 Recruitment was based on self-identification in response to an advertisement in CFS/ME  
23 community support networks across Poland, as well as a general advertisement on local radio  
24 and social media.  
25  
26

27  
28 Initially any individuals willing to participate were directed to a phone line. Within days of  
29 setting up the phone line it became clear that this mechanism to identify and recruit potential  
30 participants would be overwhelmed. The team therefore directed all potential participants to a  
31 website where more information about the study was available and where individuals were  
32 invited to self-complete the Fukuda criteria online. If individuals, on completing the online  
33 scoring, felt that they met the Fukuda criteria [4] within 7 days they were invited to attend the  
34 research facility. To be eligible for this study, participants were required to 1) meet Fukuda  
35 criteria, 2) be between 25 and 65 years of age, and 3) be a resident of Poland. The identification  
36 process is shown in **Figure 1**.  
37  
38  
39  
40  
41  
42

### 43 **Patient and public involvement**

44  
45  
46 Patients were not involved in the design of this study. Results from the current study will be  
47 disseminated to participants through newsletters in layman terms. We will also communicate  
48 our results through a number of other scientific and non-scientific channels including  
49 presentations at relevant congresses or in relevant fora.  
50  
51  
52  
53  
54  
55  
56  
57  
58  
59

### 60 **Clinical assessment**

1  
2  
3 Those who fulfilled the eligibility criteria for Centers for Disease Control and Prevention  
4 (Fukuda) were invited to attend the research unit at the chronobiology laboratory (windowless  
5 and sound-insulated room, temperature 22°C, humidity 60%). They were seen by members of  
6 the research team in an assessment that took place over 40 minutes. Individuals participated in  
7 a standardized baseline assessment which comprised a battery of symptom assessment tools.  
8 Those screened as fulfilling criteria for CFS/ME [4] were also reviewed clinically by a member  
9 of the research team in order to determine whether their symptoms were consistent with these  
10 criteria, that there were no psychiatric exclusions or other diagnoses that could be associated  
11 with CFS/ME or where fatigue was not the primary complaint. Sixty nine individuals  
12 subsequently went on to have a further baseline objective assessment.

### 21 **Symptom assessment tools**

22 Participants completed the following screening symptom assessment tools.

#### 23 Measure of fatigue - Chalder fatigue scale

24 The Chalder Fatigue Scale (CFQ) is a self-administered questionnaire for measuring the extent  
25 and severity of fatigue within both clinical and non-clinical, epidemiological populations [5].

26 The CFQ provides an 11 item brief tool to measure both physical and psychological fatigue.  
27 Each item is answered on a 4-point scale ranging from the asymptomatic to maximum  
28 symptomatology, such as 'Better than usual', 'No worse than usual', 'Worse than usual' and  
29 'Much worse than usual'. For all items, the least symptomatic answers are on the left of the  
30 response-set, providing an easy-to-understand checklist for respondents. Using the Likert  
31 scoring method, responses on the extreme left receive a score of 0, increasing to 1, 2 or 3 as  
32 they become more symptomatic. The respondent's global score ranges from 0 to 33. The global  
33 score also spans two dimensions—physical fatigue (measured by items 1–7) and psychological  
34 fatigue (measured by items 8–11). The Likert scoring system allows for means and distributions  
35 to be calculated for both the global total as well as the two sub-scales.

36 Reliability coefficients for the CFQ 11 have been high in studies of CFS/ME patients [6]. It  
37 has been used widely in studies ascertaining tiredness among working populations as well as  
38 patient groups and consistently fares extremely well against other longer and multidimensional  
39 tools [7].

#### 40 Hospital anxiety and depression scale (HADS)

41 The HADS [8] is a 14-item measure of current anxiety (HADS-A) and depression (HADS-D).  
42 Caseness for anxiety or depression is revealed by subscores greater or equal to 11 on each  
43 subscale.

#### 44 Epworth sleepiness scale (ESS)

1  
2  
3 In view of the association between excessive daytime sleepiness and fatigue, all subjects  
4 completed the ESS questionnaire (possible score range 0–24) [9]. This fully validated tool  
5 assesses daytime hypersomnolence, with a score  $\geq 10$  being indicative of significant  
6 hypersomnolence during the day.  
7  
8

### 9 10 COMPASS 31

11 Participants completed the Autonomic Symptom Profile [10] as a self-report measure of  
12 autonomic symptoms. However, scoring was performed according to the recently abbreviated  
13 and psychometrically improved version of this questionnaire, the Composite Autonomic  
14 Symptom Score 31 (COMPASS 31) [11]. Scoring consists of 31 items from six domains –  
15 orthostatic intolerance, vasomotor, secretomotor, gastrointestinal, bladder, pupillomotor – each  
16 weighted according to number of items and clinical relevance. Weighted individual domain  
17 scores are totalled to a maximum of 100, which indicates greater symptom load.  
18  
19

### 20 **Assessment of quality of life**

21 Participants also completed the following quality of life measure:

#### 22 Quality of life scale (QOLS)

23 The Quality of Life Scale (QOLS) used in this study has 16 items. The QOLS has been used  
24 in studies of healthy adults and patients with rheumatic diseases, fibromyalgia, chronic  
25 obstructive pulmonary disease, gastrointestinal disorders, cardiac disease, spinal cord injury,  
26 psoriasis, urinary stress incontinence, posttraumatic stress disorder, and diabetes.  
27

28 The QOLS is scored by adding up the score on each item to yield a total score for the instrument.  
29 Scores can range from 16 to 112. There is no automated administration or scoring software for  
30 the QOLS. Higher scores mediate better quality of life. The average total for healthy  
31 populations is approximately 90 [10-14].  
32  
33

### 34 **Functional assessment of the cardiac and autonomic nervous system**

#### 35 Apparatus

36 All participants underwent formal autonomic assessment in the Cardiovascular Laboratory, all  
37 measurements were performed with a dedicated high-tech device – Task Force Monitor (TFM,  
38 CNSystems, Medizintechnik, Graz, Austria). The main area of TFM application is as an  
39 automated and computed beat-to-beat analysis of heart rate (electrocardiogram (ECG))  
40 oscillometric and non-invasive continuous blood pressure measurements (oscBP, contBP). On  
41 the basis of these biological signals source hemodynamic and autonomic parameters are  
42 calculated. The TFM facilitates continuous (beat-to-beat), reliable and reproducible  
43 measurements of all parameters [15-18]. Basic statistics (mean, median, min, max and SD) of  
44 all parameters were calculated automatically for defined periods.  
45  
46  
47  
48  
49  
50  
51  
52  
53  
54  
55  
56  
57  
58  
59  
60

### Protocol of autonomic assessment

All subjects were instructed to refrain from smoking, caffeine, alcohol ingestion, and intensive physical activity on the day of investigation and ate a light breakfast only. All investigations were performed at the same time of day, and took place in a neutral ambient temperature, and a quiet room [19,20].

In all cases TFM measurements were performed during 10 minutes of supine rest (phase 1) and subsequently asked to standing (phase 2) during which changes in heart rate were assessed and where haemodynamic changes were consistent with recognized consensus criteria for a diagnosis of postural tachycardia syndrome made [21].

### Assessment of heart rate and blood pressure variability

All cardiovascular assessments were carried out with continuous heart rate and beat-to-beat blood pressure measurement implemented in TFM. The integrity of the autonomic nervous system was assessed using a three-channel ECG and continuous blood pressure monitoring (contBP – with periodically cross-checked oscillometric BP measurements). TFM automatically provides a power spectral analysis for heart rate variability (HRV) and blood pressure variability (BPV). HRV and BPV spectral analysis is conducted using the adaptive autoregressive model (AAR) proposed by Bianchi et al. [22]. In addition to total power spectral density (PSD), three frequency bands are calculated with TFM: VLF, LF and HF, but only two of these were taken into account as there were short-term autonomic regulations of HR and BP i.e. LF 0.05-0.17 Hz (low-frequency band) and HF 0.17-0.4 Hz (high frequency band) in absolute values, and both frequencies were also calculated in normalized units (LFnu-RRI, HFnu-RRI for heart rate variability and LFnu-sBP, HFnu-sBP, LFnu-dBP and HFnu-dBP for systolic and diastolic blood pressure variability). Using only HRV bands when considering autonomic regulation has some limitations, therefore TFM also provides spectral analysis of blood pressure variability, a more reliable tool for sympathetic and parasympathetic autoregulation assessment. For that purpose bands: LFnu-RRI, LF-RRI, LF-sBP, LFnu-sBP, LF-dBP and LFnu-dBP are referred to as sympathetic modulation of sinoatrial (SA) node and vasomotor function. Whilst HF-RRI and HFnu-RRI bands refer to parasympathetic modulation of cardiovascular activity. Cardiovascular disturbances of the autonomic circulatory regulation cause alternations in spectra and proportion of frequencies in the total spectrum power. Parameters such as PSD, LF and HF are quantitative indicators of autonomic regulation and the ratio between LF and HF band represents the sympatho-vagal balance [23-25].

We classified each individual's autonomic function profile into sympathetic or parasympathetic dominant according to their sympatho-vagal balance during 10 minutes of supine rest. This



1  
2  
3 was based upon previous studies and assessed using the LF/HF ratio which was considered to  
4 suggest a sympathetic dominant pattern if LF/HF was  $>1$  and parasympathetic if the ratio was  
5  $<1$ . [26, 27]  
6  
7

#### 8 Statistical analyses

9  
10 Statistical characteristics of measured values were presented as arithmetic means and standard  
11 deviations ( $\pm$ SD). The normality of continuous variables distribution was evaluated with the  
12 *Shapiro–Wilk* test Depending on distribution characteristics of analysed variables, the  
13 independent samples Student t-test or the Mann–Whitney U test was used to evaluate  
14 significance of differences between measured values obtained in the group of each phenotypes.  
15 All calculations were performed with the package *Statistica 13.0* (StatSoft), with the assumed  
16 level of statistical significance of  $\alpha < 0.05$ .  
17  
18  
19  
20  
21  
22  
23

## 24 RESULTS

### 25 Recruitment of the cohort – the prevalence of fatigue in a Polish population

26 During the media campaign 1400 individuals identified themselves to the research team as  
27 fitting, they believed, the criteria for CFS/ME. 1308 of those subsequently were found not to  
28 meet the Fukuda criteria for CFS/ME.  
29  
30

31 In the 1308 (93%) individuals who identified themselves as fatigued, recognized chronic  
32 conditions were identified. These were conditions associated with the symptom of fatigue and  
33 therefore could have been the attributable cause for their fatigue symptoms (and therefore not  
34 consistent with the Fukuda diagnostic criteria). These fatigue associated conditions were  
35 broadly classified into conditions that were: neurological (n=280, 21.5%), neurodegenerative  
36 (n=200, 15%), psychiatric (n=654, 50%) and immunologic (n=174, 13.5%) disorders.  
37  
38  
39  
40  
41  
42

### 43 Characteristics of a polish cohort of CFS/ME patients meeting the Fukuda criteria

44 Of the total group with CFS/ME, 41 were female (59.4%). The majority of individuals had a  
45 normal BMI (58%) with 24 (35%) being considered overweight and 3 (4.3%) being obese. Two  
46 individuals (2.9%) were considered underweight. The majority of individuals were considered  
47 to be of a specialist professional group (engineers).  
48  
49

### 50 Symptom burden of a polish cohort of CFS/ME patients meeting the Fukuda criteria

51 The majority of those with CFS/ME had had symptoms for over 2 years with 37% having  
52 symptoms for 2-5 years and 21.7% having symptoms for more than 10 years. The vast majority  
53 described unrefreshing sleep with impaired short-term memory and concentration (91.3%),  
54 post-exertional malaise 89%, multi-joint pain without swelling or redness 72.5%, headaches  
55  
56  
57  
58  
59  
60

1  
2  
3 62.3%, muscle pain 66.7%, sore throat 39.1% and tender cervical or axillary lymph nodes  
4 30.4%.

5  
6 **Table 1** shows the prevalence of other symptoms identified in those found to have Fukuda  
7 CFS/ME. This illustrates the fact that many clinical specialists may come into contact with  
8 individuals who may subsequently be identified as having CFS/ME. When COMPASS 31  
9 scores were considered these are shown in **Table 2** with 50% of individuals with CFS/ME  
10 having symptoms consistent with orthostatic intolerance. HAD scores were high for both  
11 anxiety and depression and 43/69 (62%) were found to have ESS scores  $\geq 10$  i.e. consistent  
12 with excessive daytime sleepiness. Considering scores from HADS A & D, 26/69 (38%) had  
13 scores consistent with significant anxiety and 22/69 (32%) depression.

### 20 **Quality of life of a polish cohort of CFS/ME patients meeting the Fukuda criteria**

21 Quality of life scores assessed using the QOLS were mean (SD) 64 (11). This confirmed that  
22 quality of life is significantly impaired in those with Fukuda criteria CFS/ME and well below  
23 the expected for a healthy population. When we considered the relationship between quality of  
24 life and the other symptoms frequently seen in those with CFS/ME, there were strong  
25 significant negative relationships between quality of life and fatigue ( $p < 0.0001$ ), anxiety  
26 ( $p = 0.0009$ ), depression ( $p < 0.0001$ ) and autonomic symptoms ( $p = 0.04$ ), figure 2. There were  
27 no significant relationships between age or daytime sleepiness.

### 34 **Autonomic function in a polish cohort of CFS/ME patients meeting the Fukuda criteria**

35 When we classified the cohort according to predominance of sympathetic or parasympathetic  
36 function, 44/69 (64%) were found to be sympathetic predominant and 25 parasympathetic.  
37 When we considered symptom burden between these two phenotypes, there were no significant  
38 differences in symptoms or impact upon quality of life between the groups (**Table 3**). At rest,  
39 the sympathetic predominant group had significantly higher heart rate, ER and LF HRV and  
40 reduced LVET, PEP and HF HRV compared to the parasympathetic group. The total PSD was  
41 comparable between groups however sympatheticovagal balance was different between the  
42 phenotypes with increased LF BPV in both diastolic and systolic blood pressure, reduced  
43 baroreflex sensitivity in those with the sympathetic dominant phenotype (**Table 4**).

44 Those with the parasympathetic predominant phenotype were more likely to have had the  
45 disease for between 5-10 years (**table 5**).

### 54 **Prevalence of postural tachycardia syndrome in a Polish cohort of CFS/ME patients**

55 The presence of postural tachycardia syndrome is frequently seen in those with CFS [28,29].  
56 A total of 35 (51%) of the CFS group had haemodynamic responses to standing consistent with  
57  
58  
59  
60

1  
2  
3 a diagnosis of PoTS. There was no difference in the proportion of those with PoTS in the  
4 sympathetic or parasympathetic groups (**Table 5**).

## 6 **DISCUSSION**

8 This study has confirmed for the first time that chronic fatigue is a common symptom  
9 experienced by the Polish population and that CFS/ME is an under-recognized syndrome in this  
10 group. The key finding of this study is that prevalence is similar to reported data in the other  
11 countries and is associated with a large symptom burden and impaired quality of life.

12 Of the cohort of 1400 who self-presented with fatigue only 69 subsequently were confirmed as  
13 having CFS/ME using the Fukuda criteria. This suggests that in Poland there are significant  
14 amounts of fatigue related to other conditions, with only a small percentage of those  
15 experiencing fatigue having CFS/ME *per se* (69/1400; 5%).

16 From the initial responses, we rigorously identified those who met with Fukuda criteria for  
17 CFS/ME. We did this by asking individuals to complete the tool, but also using face to face  
18 sessions with trained clinicians. We believe therefore, that our cohort represents a well  
19 characterized group who we are confident fulfil one of the recognised diagnostic criteria for  
20 CFS/ME. When we compared this Polish cohort with CFS/ME to other national cohorts there  
21 were some similarities, but also some differences.

22 Compared with the UK cohort [30] having in excess of 6500 individuals collected from the UK  
23 NHS Clinical CFS services, the Polish cohort appeared to be of a similar age to the UK cohort  
24 with comparable levels of fatigue and illness duration, have similar levels of sleep and cognitive  
25 symptoms but less post-exertional malaise, muscle pain and headaches. The Polish cohort  
26 appeared to have more males than was seen in the UK cohort.

27 As in previous national cohorts [3, 30, 31], the presence of fatigue in the Polish population was  
28 associated with impaired quality of life. As has been seen previously, impaired quality of life  
29 associates with the severity of symptoms such as fatigue and autonomic dysfunction, but in  
30 contrast to other studies, not daytime sleepiness. Impaired quality of life is also associated with  
31 increased anxiety and more depression. As in other series, we would suggest that this  
32 association is a secondary phenomenon i.e. arising as a consequence of the condition rather than  
33 a cause. The fact that we rigorously excluded depression and psychiatric disorders when  
34 determining the criteria would be consistent with this.

35 Our study has also confirmed a high prevalence of the condition postural tachycardia syndrome  
36 (PoTS). This form of dysautonomia [21] has been recognized as occurring frequently in those  
37 with CFS/ME [28,29], and represents a potential therapeutic target in those with this illness. It  
38  
39  
40  
41  
42  
43  
44  
45  
46  
47  
48  
49  
50  
51  
52  
53  
54  
55  
56  
57  
58  
59  
60

1  
2  
3 is important that clinicians and researchers are aware of the overlap and are trained to identify  
4 and manage this condition.  
5

6 All of these differences might arise because of the self-report nature of the Polish cohort and  
7 that the UK cohort was recruited from the National Health Service clinical services which were  
8 specifically set up to identify and manage CFS/ME [3]. A comprehensive review of the  
9 prevalence of CFS/ME in three regions of England involving 143,000 subjects suggested an  
10 older cohort with longer disease duration than that seen in the UK clinical services.  
11  
12  
13  
14

15 An Australian cohort [31] was established using similar identification strategies to our Polish  
16 cohort with self-report in response to adverts inviting individuals to participate in a research  
17 database. Individuals in this cohort were included if they had received the diagnosis from a  
18 primary care physician. Again the proportion of females in the Australian cohort was higher  
19 than in the Polish cohort  
20  
21  
22  
23

24 This study has a number of limitations. The case ascertainment process used self-report as the  
25 means of identifying those with CFS/ME. It became clear during the radio and television  
26 campaign that there was considerable interest, and as a result our recruitment process needed  
27 to be changed to facilitate timely screening of those self-presenting with fatigue. It is clear that  
28 a thorough, methodologically robust epidemiological study of fatigue and its consequences in  
29 a Polish population are now needed.  
30  
31  
32  
33

34 Our study has confirmed that fatigue is a common and under-recognised symptom affecting the  
35 Polish population. It impacts upon quality of life and is associated with a range of other  
36 symptoms that have been previously recognised in other cohort studies. Despite this, there are  
37 no clinical services for fatigue or CFS/ME in Poland and it is poorly understood and  
38 infrequently diagnosed. Our research programme now aims to consider the effect of  
39 interventions upon fatigue in a Polish CFS/ME population.  
40  
41  
42  
43  
44  
45  
46  
47  
48  
49  
50  
51  
52  
53  
54  
55  
56  
57  
58  
59  
60

1  
2  
3 **Figure legends**  
4

5 Figure 1: Study protocol

6 Figure 2: The relationship between quality of life measured using the QOLS scale and a) fatigue  
7 severity assessed using the fatigue impact scale b) anxiety measured using the HADS Anxiety  
8 scale (HADS -1 ) c) depression measured using the HADS Depression Scale (HADS – 2) and  
9 d) autonomic symptom burden measured using the COMPASS 31  
10  
11  
12  
13  
14  
15  
16  
17  
18  
19  
20  
21  
22  
23  
24  
25  
26  
27  
28  
29  
30  
31  
32  
33  
34  
35  
36  
37  
38  
39  
40  
41  
42  
43  
44  
45  
46  
47  
48  
49  
50  
51  
52  
53  
54  
55  
56  
57  
58  
59  
60

For peer review only

**Contributorship statement**

JS, DS, SMG, PZ were involved in writing of the manuscript. JS, PZ, JJK and MTF conceived and supervised the study. SK, PZ provided statistical advice. JS, PZ, JN, DS., SMG contributed conceived, designed and performed the experiments, collected and analyzed the data, revising it critically for important intellectual content and final approval of the version to be submitted.

**Competing interests:** none declared.

**Funding:** none

**data sharing:** no additional data are available.

For peer review only

## REFERENCES

1. Chronic Fatigue Syndrome/Myalgic Encephalomyelitis (encephalopathy); diagnosis and management. [www.nice.gov.org](http://www.nice.gov.org)
2. Institute of Medicine. Beyond Myalgic Encephalomyelitis/Chronic Fatigue Syndrome Redefining an Illness Committee on the Diagnostic Criteria for Myalgic Encephalomyelitis/Chronic Fatigue Syndrome; Board on the Health of Select Populations; Institute of Medicine. Washington (DC): National Academies Press (US); 2015 Feb 10. ISBN-13: 978-0-309-31689-7 ISBN-10: 0-309-31689-8
3. Nacul LC, Lacerda EM, Pheby D, Campion P, Molokhia M, Fayyaz S, Leite JCDC, Poland F, Howe A, Drachler ML. Prevalence of myalgic encephalomyelitis/chronic fatigue syndrome (ME/CFS) in three regions of England: a repeated cross sectional study in primary care. *BMC Medicine* 2011;9:91.
4. Fukuda K, Straus SE, Hickie I, Sharpe MC, Dobbins JG, Komaroff A, International Chronic Fatigue Syndrome Study Group. The Chronic Fatigue Syndrome: A Comprehensive Approach to Its Definition and Study. *Annals of Int Med.* 1994;121:953-959.
5. Chalder T, Berelowitz G, Pawlikowska T, Watts L, Wessely S, Wright D, et al. (1993) Development of a fatigue scale. *Journal of Psychosomatic Research*,37: 147-53.
6. Morriss RK Wearden AJ Mullis R . Exploring the validity of the Chalder Fatigue Scale in chronic fatigue syndrome. *J Psychosom Res* 1998;45:411–417.
7. De Vries J Michielsen HJ Van Heck GL . Assessment of fatigue among working people: a comparison of six questionnaires. *Occup Environ Med* 2003;60(Suppl. 1):i10–i15.
8. Zigmond, A. S., & Snaith, R.P. (1983). The Hospital Anxiety And Depression Scale, *Acta Psychiatrica Scandinavica*, 67, 361-370.
9. Johns MW. A new method for measuring daytime sleepiness: the Epworth sleepiness scale. *Sleep*. 1991 Dec;14(6):540-5.
10. Suarez et al., *Neurology*, 1999, 52(3):523-528
11. David M. Sletten,<sup>a</sup> Guillermo A. Suarez,<sup>†</sup>,<sup>a</sup> Phillip A. Low,<sup>a</sup> Jay Mandrekar,<sup>b</sup> and Wolfgang Singera COMPASS 31: A Refined and Abbreviated Composite Autonomic Symptom Score. *Mayo Clin Proc.* 2012 Dec; 87(12): 1196–1201.
12. Burckhardt CS, Woods SL, Schultz AA, Ziebarth DM (1989). Quality of life of adults with chronic illness: A psychometric study. *Research in Nursina and Health*, 12, 347-354.

13. Burckhardt, CS, Clark SR, Bennett RM (1993). Fibromyalgia and quality of life: A comparative analysis. *Journal of Rheumatology*, 20, 475-479.
- Flanagan JC (1978). A research approach to improving our quality of life. *American Psychologist*, 33, 138-147.
14. Flanagan JC (1982). Measurement of quality of life: Current state of the art. *Archives of Physical Medicine and Rehabilitation*, 63, 56-59.
15. Fortin J, Habenbacher W, Gruellenberger R, Wach P, Skrabal F. Real time monitor for hemodynamic beat-to-beat parameters and power spectra analysis of biosignals. *Proceedings of the 20th annual International Conference of the IEEE Engineering in Medicine and Biology Society*; 1998 29 Oct-1 Nov; Hong Kong.
16. Fortin J, Klinger Th, Wagner Ch, Sterner H, Madritsch Ch, Grüllenberger R. et al. The Task Force Monitor—a non-invasive beat-to-beat monitor for hemodynamic and autonomic function of the human body. *Proceedings of the 20th annual International Conference of the IEEE Engineering in Medicine and Biology Society*; 1998 29 Oct-1 Nov; Hong Kong.
17. Fortin J, Marte W, Grullenberger R. Continuous non-invasive blood pressure monitoring using concentrically interlocking control loops. *Comput Biol Med* 2006; 36:941-57.
18. Parati G, Ongaro G, Bilo G, Glavina F, Castiglioni P, Di Renzo M. et al. Non-invasive beat-to-beat blood pressure monitoring: new developments. *Blood Press Monit* 2003; 8:31-6.
19. Special article. Assessment: Clinical autonomic testing report of the therapeutics and technology subcommittee of the American Academy of Neurology. *Neurology* 1996;46:873-880.
20. Low PA, Benarroch EE. *Clinical autonomic disorders*. Philadelphia: Lippincott Williams and Wilkins; 1997.
21. Sheldon RS, Grubb BP, Olshansky B, Shen W, Calkins H, Brignole M, Raj SR, Krahn AD, Morillo CA, Stewart JM, Sutton R, Sandroni P, Friday KJ et al., Heart Rhythm Society Expert Consensus Statement on the Diagnosis and Treatment of Postural Tachycardia Syndrome, Inappropriate Sinus Tachycardia, and Vasovagal Syncope. *Heart Rhythm* 2015; 12: e41-e63 <https://doi.org/10.1016/j.hrthm.2015.03.029>
22. Bianchi AM, Mainardi LT, Meloni C, Chierchia S, Cerutti S. Continuous monitoring of the sympatho-vagal balance through spectral analysis. *IEEE Eng Med Biol Mag* 1997;16:64-73.
23. Taskforce of the European Society of Cardiology and the North American Society of Pacing and Electrophysiology. Heart rate variability: Standards of measurement, physiological interpretation, and clinical use. *Eur Heart J* 1996;17:354-81.
24. Stauss HM. Heart rate variability. *Am J Physiol Integr Comp Physiol* 2003;285:R927-31.



- 1  
2  
3 25. Akselrod S, Gordon D, Madwed JB, Sanidman NC, Shannon DC, Cohen RJ. Hemodynamic  
4 regulation: investigation by spectral analysis. *Am J Physiol* 1985; 249:H867-75.  
5  
6 26. Eckberg DL. Sympathovagal Balance. A critical appraisal.  
7  
8 27. Malliani A, Pagani M, Montana N, Mela GC. Sympathovagal Balance. A reappraisal.  
9 *Circulation* 1998;98:2640-2643.  
10  
11 28. A Hoad, G Spickett , J Elliott , J Newton. Postural Orthostatic Tachycardia Syndrome Is an  
12 Under-Recognized Condition in Chronic Fatigue Syndrome. *QJM* 101 (12), 961-965. 2008 Sep  
13 19  
14  
15 29. G K Reynolds 1 , D P Lewis , A M Richardson , B A Lidbury. Comorbidity of Postural  
16 Orthostatic Tachycardia Syndrome and Chronic Fatigue Syndrome in an Australian Cohort. *J*  
17 *Intern Med* 275 (4), 409-417. 2013 Nov 29.  
18  
19 30. Collin S, Nuevo R, van de Putte EM, Nijhof SL, Crawley E. Chronic Fatigue Syndrome  
20 (CFS) or Myalgic encephalomyelitis (ME) is different in children compared to in adults: a study  
21 of UK and Dutch clinical cohorts. *BMJ Open* 2015;5:e008830  
22  
23 31. Johnston SC, Staines DR, Marshall-Gradisnik SM. Epidemiological characteristics of  
24 chronic fatigue syndrome/myalgic encephalomyelitis in Australian patients. *Clinical*  
25 *Epidemiology* 2016;8:97-107.  
26  
27  
28  
29  
30  
31  
32  
33  
34  
35  
36  
37  
38  
39  
40  
41  
42  
43  
44  
45  
46  
47  
48  
49  
50  
51  
52  
53  
54  
55  
56  
57  
58  
59  
60

**TABLE 1: OTHER SYMPTOMS REPORTED AT INITIAL ASSESSMENT, N=69**

| Specific symptom                                       | No | %    |
|--------------------------------------------------------|----|------|
| IBS                                                    | 12 | 17.7 |
| Migraine                                               | 17 | 24.6 |
| seasonal allergy                                       | 8  | 11.6 |
| slight food intolerance / nausea / alcohol intolerance | 40 | 58.1 |
| back pain                                              | 13 | 18.8 |
| Tinnitus                                               | 9  | 13.0 |
| palpitations with no cardiac history                   | 9  | 13.0 |
| periodical fever                                       | 8  | 11.6 |
| sensory disturbances                                   | 0  | 0    |
| chest symptoms with no medical history                 | 15 | 21.7 |
| mood fluctuations                                      | 30 | 43.5 |
| chronic stress                                         | 41 | 59.4 |
| overworked / work stress                               | 34 | 49.3 |
| shift work                                             | 0  | 0    |
| care work                                              | 3  | 4.3  |
| newborn care                                           | 7  | 10.1 |
| frequent infections                                    | 9  | 13.0 |
| night hyperhidrosis                                    | 22 | 31.9 |
| sleep disturbance / hypersomnia                        | 28 | 40.6 |
| unexplained anxiety                                    | 3  | 4.3  |
| sensory disturbance                                    | 10 | 14.5 |

review only

**TABLE 2: COMPASS 31 - AUTONOMIC SYMPTOMS, N=69**

| <b>Specific symptom</b>             | <b>No</b> | <b>%</b> |
|-------------------------------------|-----------|----------|
| <b>orthostatic intolerance</b>      | 40        | 50.0     |
| <b>dizziness / headaches</b>        | 41        | 59.4     |
| <b>sudden paleness</b>              | 25        | 36.2     |
| <b>arrhythmia</b>                   | 29        | 42.0     |
| <b>dryness eyes mouth</b>           | 45        | 65.2     |
| <b>vasomotor</b>                    | 24        | 34.8     |
| <b>secretomotor</b>                 | 30        | 43.5     |
| <b>upper gastro. tract symptoms</b> | 38        | 55.1     |
| <b>unknown gastro. pain</b>         | 26        | 37.7     |
| <b>constipation</b>                 | 21        | 30.4     |
| <b>diarrhea</b>                     | 28        | 40.6     |
| <b>urinary</b>                      | 21        | 30.4     |
| <b>sexual failure</b>               | 19        | 27.5     |
| <b>sleep</b>                        | 68        | 98.5     |
| <b>pupilomotor</b>                  | 28        | 40.6     |
| <b>anxiety</b>                      | 34        | 49.3     |

**TABLE 3: BASELINE QUALITY OF LIFE SCORES, N=69**

| Variable                  | Total Group |      | Sympathetic dominant (n=44) |      | parasympathetic dominant (n=25) |      |        |
|---------------------------|-------------|------|-----------------------------|------|---------------------------------|------|--------|
|                           | Mean        | SD   | Mean                        | SD   | Mean                            | SD   |        |
| Chalder Fatigue Scale     | 25.3        | 3.7  | 25.5                        | 3.8  | 25.0                            | 3.8  | p>0.05 |
| Fatigue Severity Scale    | 48.8        | 8.7  | 48.0                        | 8.5  | 50.2                            | 9.1  | p>0.05 |
| Fatigue Impact Scale      | 92.2        | 26.2 | 92.6                        | 24.6 | 91.6                            | 29.2 | p>0.05 |
| HADS_A                    | 9.6         | 3.4  | 9.3                         | 3.1  | 10.1                            | 3.9  | p>0.05 |
| HADS_D                    | 8.5         | 3.1  | 8.5                         | 3.0  | 8.6                             | 3.4  | p>0.05 |
| BDI                       | 17.6        | 8.1  | 18.3                        | 8.3  | 16.4                            | 7.9  | p>0.05 |
| Epworth Sleepiness Scale  | 10.3        | 5.6  | 10.6                        | 5.3  | 9.8                             | 6.2  | p>0.05 |
| Quality of Life Scale     | 63.5        | 10.9 | 62.1                        | 11.9 | 65.9                            | 8.8  | p>0.05 |
| Orthostatic Grading Scale | 8.4         | 3.1  | 3.5                         | 3.4  | 3.4                             | 2.5  | p>0.05 |

review only

**TABLE 4 CARDIOVASCULAR / AUTONOMIC PARAMETERS**

|                                             | Variable                 | Total group (n=69) |        | Sympathetic dominant (n=44) |        | parasympathetic dominant (n=25) |        |        |
|---------------------------------------------|--------------------------|--------------------|--------|-----------------------------|--------|---------------------------------|--------|--------|
|                                             |                          | Mean               | SD     | Mean                        | SD     | Mean                            | SD     |        |
| <b>Haemodynamics</b>                        | <b>HR</b>                | 67.6               | 9.2    | 70.1                        | 8.4    | 63.2                            | 9.0    | 0.0017 |
|                                             | <b>Sbp</b>               | 117.3              | 13.3   | 118.5                       | 11.3   | 115.2                           | 16.2   | p>0.05 |
|                                             | <b>Dbp</b>               | 79.3               | 10.6   | 79.6                        | 9.7    | 78.8                            | 12.1   | p>0.05 |
|                                             | <b>mBP</b>               | 95.9               | 11.1   | 96.0                        | 9.9    | 95.7                            | 13.2   | p>0.05 |
| <b>Cardiac Impedance</b>                    | <b>SI</b>                | 52.3               | 12.4   | 50.8                        | 12.5   | 54.9                            | 12.1   | p>0.05 |
|                                             | <b>CI</b>                | 3.5                | 0.8    | 3.5                         | 0.8    | 3.4                             | 0.8    | p>0.05 |
|                                             | <b>TPRI</b>              | 2304.7             | 747.3  | 2285.2                      | 684.3  | 2339.0                          | 861.1  | p>0.05 |
|                                             | <b>EDI</b>               | 85.0               | 19.9   | 82.3                        | 19.9   | 89.7                            | 19.5   | p>0.05 |
|                                             | <b>IC</b>                | 62.8               | 21.2   | 59.7                        | 20.6   | 68.2                            | 21.5   | p>0.05 |
|                                             | <b>ACI</b>               | 85.7               | 34.4   | 80.4                        | 33.8   | 95.0                            | 34.3   | p>0.05 |
|                                             | <b>LVWI</b>              | 4.4                | 1.1    | 4.5                         | 1.1    | 4.4                             | 1.2    | p>0.05 |
|                                             | <b>LVET</b>              | 318.2              | 17.3   | 313.2                       | 18.2   | 327.0                           | 11.1   | 0.0005 |
|                                             | <b>TFC</b>               | 31.3               | 4.5    | 30.8                        | 4.7    | 32.3                            | 4.0    | p>0.05 |
|                                             | <b>PEP</b>               | 110.2              | 12.1   | 107.1                       | 11.3   | 115.7                           | 11.6   | 0.0040 |
|                                             | <b>STR</b>               | 34.9               | 4.3    | 34.6                        | 4.7    | 35.5                            | 3.4    | p>0.05 |
|                                             | <b>ER</b>                | 35.5               | 3.3    | 36.3                        | 2.6    | 34.2                            | 3.9    | 0.0092 |
|                                             | <b>MSER</b>              | 300.8              | 68.9   | 306.2                       | 72.5   | 291.4                           | 62.4   | p>0.05 |
|                                             | <b>REP</b>               | 77.8               | 16.8   | 79.7                        | 19.8   | 74.5                            | 9.1    | p>0.05 |
|                                             | <b>HI</b>                | 0.3                | 0.1    | 0.3                         | 0.1    | 0.4                             | 0.1    | p>0.05 |
| <b>RZ</b>                                   | 187.1                    | 12.2               | 185.3  | 11.1                        | 190.4  | 13.6                            | p>0.05 |        |
| <b>TAC</b>                                  | 2.6                      | 0.7                | 2.5    | 0.7                         | 2.8    | 0.8                             | p>0.05 |        |
| <b>Heart rate variability</b>               | <b>LFnu-RRI</b>          | 54.2               | 17.2   | 62.2                        | 14.0   | 40.1                            | 12.7   | 0.0000 |
|                                             | <b>HFnu-RRI</b>          | 45.8               | 17.2   | 37.8                        | 14.0   | 59.9                            | 12.7   | 0.0000 |
|                                             | <b>PSD-RRI</b>           | 1684.1             | 1993.7 | 1604.9                      | 2166.9 | 1823.4                          | 1678.7 | p>0.05 |
|                                             | <b>LF/HF-RRI</b>         | 1.7                | 1.6    | 2.3                         | 1.8    | 0.8                             | 0.4    | 0.0000 |
| <b>Diastolic Blood pressure variability</b> | <b>LFnu-Dbp</b>          | 52.2               | 14.7   | 59.7                        | 10.2   | 38.9                            | 11.7   | 0.0000 |
|                                             | <b>HFnu-dBP</b>          | 14.0               | 10.4   | 11.0                        | 7.5    | 19.3                            | 12.7   | 0.0004 |
|                                             | <b>PSD-dBP</b>           | 13.6               | 16.5   | 15.2                        | 19.3   | 10.8                            | 9.5    | p>0.05 |
|                                             | <b>LF/HF-dBP</b>         | 6.6                | 6.2    | 8.7                         | 6.8    | 2.8                             | 1.8    | 0.0000 |
| <b>Systolic Blood pressure variability</b>  | <b>LFnu-sBP</b>          | 42.1               | 13.5   | 47.5                        | 10.7   | 32.6                            | 12.9   | 0.0000 |
|                                             | <b>HFnu-sBP</b>          | 16.5               | 10.8   | 15.6                        | 11.0   | 18.2                            | 10.4   | p>0.05 |
|                                             | <b>PSD-sBP</b>           | 20.2               | 30.2   | 17.5                        | 16.3   | 25.0                            | 45.5   | p>0.05 |
|                                             | <b>LF/HF-sBP</b>         | 3.8                | 2.8    | 4.5                         | 3.0    | 2.5                             | 1.7    | 0.0019 |
| <b>Baroreflex parameters</b>                | <b>Total Event Count</b> | 17.4               | 13.6   | 21.5                        | 14.4   | 10.2                            | 8.4    | 0.0006 |
|                                             | <b>Total Slope Mean</b>  | 19.6               | 13.0   | 16.7                        | 8.9    | 24.8                            | 17.2   | 0.0114 |
|                                             | <b>Total BEI</b>         | 70.5               | 15.1   | 72.4                        | 14.2   | 67.0                            | 16.4   | p>0.05 |

**TABLE 5: POTS (SYMPATHETIC, N=44; PARASYMPATHETIC, N=25)**

|                                    |                    | sympathetic dominant |      | parasympathetic dominant |      | p      |
|------------------------------------|--------------------|----------------------|------|--------------------------|------|--------|
|                                    |                    | No                   | %    | No                       | %    |        |
| <b>POTS</b>                        |                    | 22                   | 45.5 | 12                       | 48   | p>0.05 |
| <b>Fatigue period</b>              | 6 month - 2 years  | 8                    | 22.9 | 8                        | 23.5 | p>0.05 |
|                                    | 2-5 years          | 14                   | 40.0 | 12                       | 35.3 | p>0.05 |
|                                    | 5-10 years         | 4                    | 11.4 | 8                        | 23.5 | 0.0492 |
|                                    | more than 10 years | 9                    | 25.7 | 6                        | 17.6 | p>0.05 |
| <b>Fatigue period IQR</b>          |                    | 2-5 years            |      | 6 month - 2 years        |      |        |
| <b>Fatigue period in years IQR</b> |                    | 8                    |      | 2.5                      |      |        |

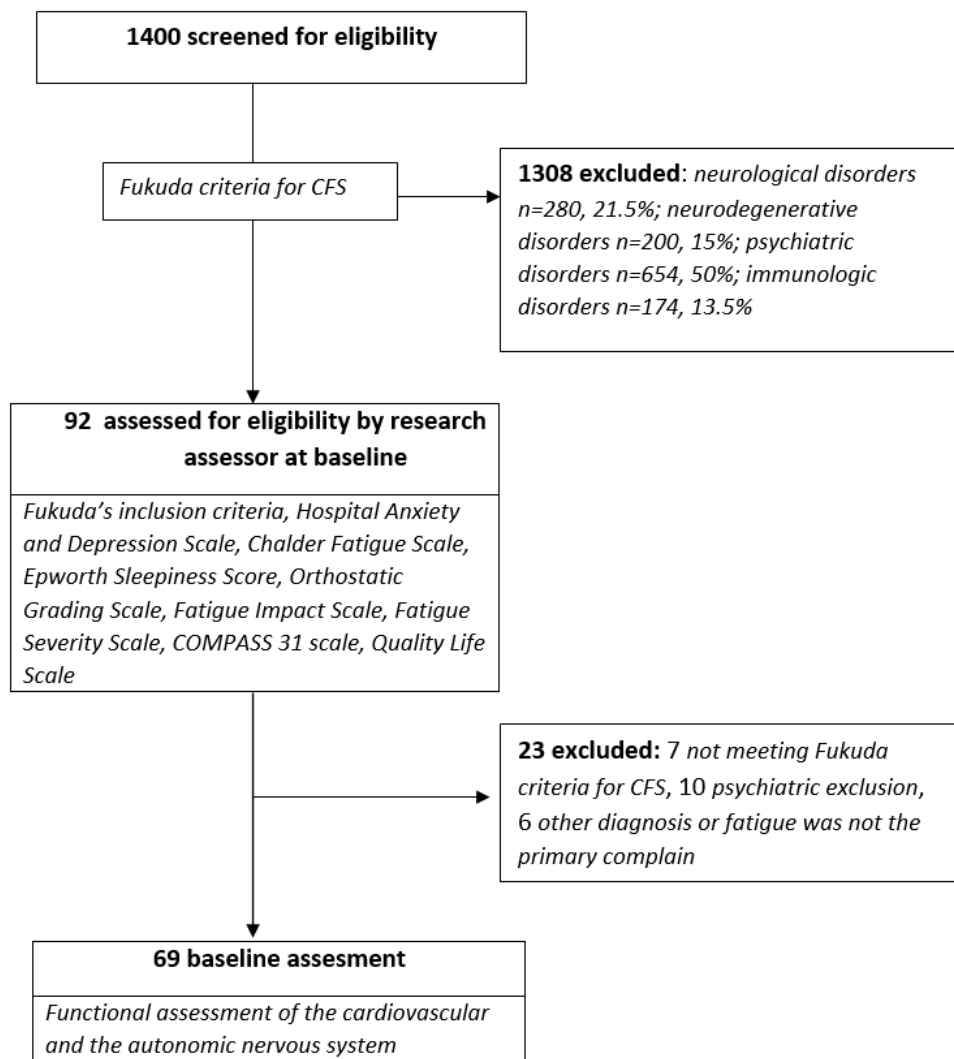

Figure 1. Study protocol

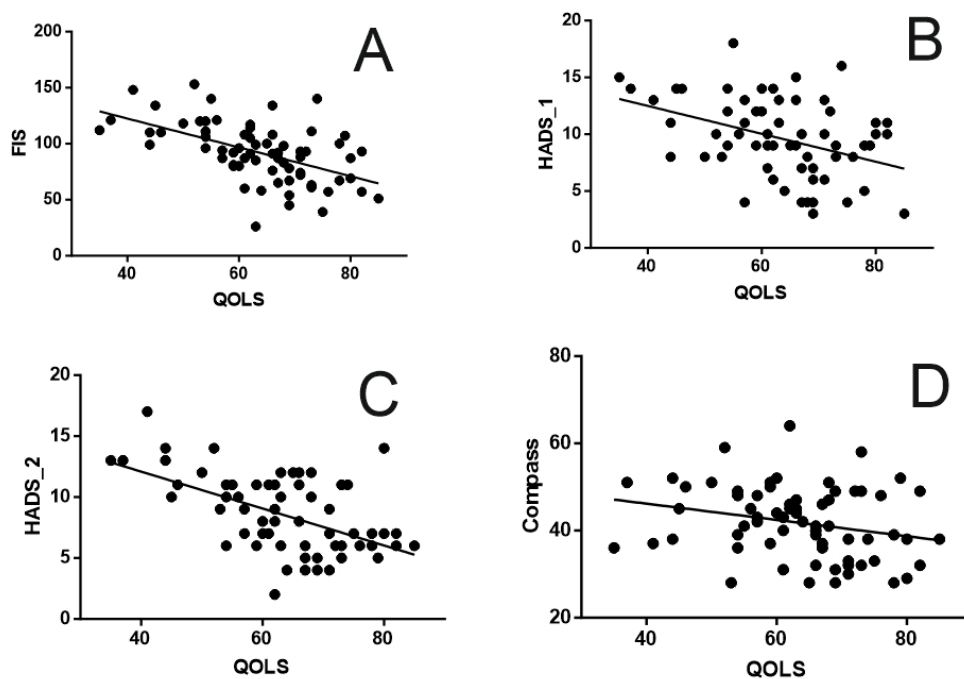

Figure 2: The relationship between quality of life measured using the QOLS scale and a) fatigue severity assessed using the fatigue impact scale b) anxiety measured using the HADS Anxiety scale (HADS -1 ) c) depression measured using the HADS Depression Scale (HADS - 2) and d) autonomic symptom burden measured using the COMPASS 31



STROBE Statement—Checklist of items that should be included in reports of *cross-sectional studies*

|                           | Item No | Recommendation                                                                                                                                                                                    | Page No |
|---------------------------|---------|---------------------------------------------------------------------------------------------------------------------------------------------------------------------------------------------------|---------|
| <b>Title and abstract</b> | 1       | (a) Indicate the study's design with a commonly used term in the title or the abstract                                                                                                            | 1       |
|                           |         | (b) Provide in the abstract an informative and balanced summary of what was done and what was found                                                                                               | 2       |
| <b>Introduction</b>       |         |                                                                                                                                                                                                   |         |
| Background/rationale      | 2       | Explain the scientific background and rationale for the investigation being reported                                                                                                              | 4       |
| Objectives                | 3       | State specific objectives, including any prespecified hypotheses                                                                                                                                  | 4, 5    |
| <b>Methods</b>            |         |                                                                                                                                                                                                   |         |
| Study design              | 4       | Present key elements of study design early in the paper                                                                                                                                           | 5       |
| Setting                   | 5       | Describe the setting, locations, and relevant dates, including periods of recruitment, exposure, follow-up, and data collection                                                                   | 5       |
| Participants              | 6       | (a) Give the eligibility criteria, and the sources and methods of selection of participants                                                                                                       | 5       |
| Variables                 | 7       | Clearly define all outcomes, exposures, predictors, potential confounders, and effect modifiers. Give diagnostic criteria, if applicable                                                          | 6-9     |
| Data sources/measurement  | 8*      | For each variable of interest, give sources of data and details of methods of assessment (measurement). Describe comparability of assessment methods if there is more than one group              | 6-9     |
| Bias                      | 9       | Describe any efforts to address potential sources of bias                                                                                                                                         | 5       |
| Study size                | 10      | Explain how the study size was arrived at                                                                                                                                                         | 5       |
| Quantitative variables    | 11      | Explain how quantitative variables were handled in the analyses. If applicable, describe which groupings were chosen and why                                                                      | 9       |
| Statistical methods       | 12      | (a) Describe all statistical methods, including those used to control for confounding                                                                                                             | 9       |
|                           |         | (b) Describe any methods used to examine subgroups and interactions                                                                                                                               |         |
|                           |         | (c) Explain how missing data were addressed                                                                                                                                                       |         |
|                           |         | (d) If applicable, describe analytical methods taking account of sampling strategy                                                                                                                |         |
|                           |         | (e) Describe any sensitivity analyses                                                                                                                                                             |         |
| <b>Results</b>            |         |                                                                                                                                                                                                   |         |
| Participants              | 13*     | (a) Report numbers of individuals at each stage of study—eg numbers potentially eligible, examined for eligibility, confirmed eligible, included in the study, completing follow-up, and analysed | 9       |
|                           |         | (b) Give reasons for non-participation at each stage                                                                                                                                              | 9       |
|                           |         | (c) Consider use of a flow diagram                                                                                                                                                                | Figure  |
| Descriptive data          | 14*     | (a) Give characteristics of study participants (eg demographic, clinical, social) and information on exposures and potential confounders                                                          | 9-11    |
|                           |         | (b) Indicate number of participants with missing data for each variable of interest                                                                                                               | 9-11    |

|                          |     |                                                                                                                                                                                                              |       |
|--------------------------|-----|--------------------------------------------------------------------------------------------------------------------------------------------------------------------------------------------------------------|-------|
| Outcome data             | 15* | Report numbers of outcome events or summary measures                                                                                                                                                         | 9-11  |
| Main results             | 16  | (a) Give unadjusted estimates and, if applicable, confounder-adjusted estimates and their precision (eg, 95% confidence interval). Make clear which confounders were adjusted for and why they were included | 9-11  |
|                          |     | (b) Report category boundaries when continuous variables were categorized                                                                                                                                    | 9-11  |
|                          |     | (c) If relevant, consider translating estimates of relative risk into absolute risk for a meaningful time period                                                                                             | 9-11  |
| Other analyses           | 17  | Report other analyses done—eg analyses of subgroups and interactions, and sensitivity analyses                                                                                                               | 9-11  |
| <b>Discussion</b>        |     |                                                                                                                                                                                                              |       |
| Key results              | 18  | Summarise key results with reference to study objectives                                                                                                                                                     | 11    |
| Limitations              | 19  | Discuss limitations of the study, taking into account sources of potential bias or imprecision. Discuss both direction and magnitude of any potential bias                                                   | 12    |
| Interpretation           | 20  | Give a cautious overall interpretation of results considering objectives, limitations, multiplicity of analyses, results from similar studies, and other relevant evidence                                   | 11-12 |
| Generalisability         | 21  | Discuss the generalisability (external validity) of the study results                                                                                                                                        | 11-12 |
| <b>Other information</b> |     |                                                                                                                                                                                                              |       |
| Funding                  | 22  | Give the source of funding and the role of the funders for the present study and, if applicable, for the original study on which the present article is based                                                | n/a   |

\*Give information separately for exposed and unexposed groups.

**Note:** An Explanation and Elaboration article discusses each checklist item and gives methodological background and published examples of transparent reporting. The STROBE checklist is best used in conjunction with this article (freely available on the Web sites of PLoS Medicine at <http://www.plosmedicine.org/>, Annals of Internal Medicine at <http://www.annals.org/>, and Epidemiology at <http://www.epidem.com/>). Information on the STROBE Initiative is available at [www.strobe-statement.org](http://www.strobe-statement.org).

# BMJ Open

## Prevalence and characteristics of Chronic fatigue syndrome/Myalgic encephalomyelitis (CFS/ME) in Poland: A cross-sectional study

|                                 |                                                                                                                                                                                                                                                                                                                                                                                                                                                                                                                                                                                                                                                                                                                                 |
|---------------------------------|---------------------------------------------------------------------------------------------------------------------------------------------------------------------------------------------------------------------------------------------------------------------------------------------------------------------------------------------------------------------------------------------------------------------------------------------------------------------------------------------------------------------------------------------------------------------------------------------------------------------------------------------------------------------------------------------------------------------------------|
| Journal:                        | <i>BMJ Open</i>                                                                                                                                                                                                                                                                                                                                                                                                                                                                                                                                                                                                                                                                                                                 |
| Manuscript ID                   | bmjopen-2018-023955.R2                                                                                                                                                                                                                                                                                                                                                                                                                                                                                                                                                                                                                                                                                                          |
| Article Type:                   | Research                                                                                                                                                                                                                                                                                                                                                                                                                                                                                                                                                                                                                                                                                                                        |
| Date Submitted by the Author:   | 19-Dec-2018                                                                                                                                                                                                                                                                                                                                                                                                                                                                                                                                                                                                                                                                                                                     |
| Complete List of Authors:       | Slomko, Joanna; Uniwersytet Mikolaja Kopernika Collegium Medicum, Department of Hygiene, Epidemiology and Ergonomy<br>Newton, Julia; Newcastle University , Institute of Cellular Medicine<br>Kujawski, Sławomir; Uniwersytet Mikolaja Kopernika Collegium Medicum, Department of Hygiene, Epidemiology and Ergonomy<br>Tafil-Klawe, Małgorzata; Uniwersytet Mikolaja Kopernika Collegium Medicum, Department of Human Physiology,<br>Klawe, Jacek; Collegium Medicum in Bydgoszcz, Nicolaus Coprenicus University in Torun<br>Staines, Donald; Griffith University, Medical Sciences<br>Marshall-Gradisnik, Sonya; Griffith University, Medical Sciences<br>Zalewski, Pawel; Uniwersytet Mikolaja Kopernika Collegium Medicum, |
| <b>Primary Subject Heading</b>: | Public health                                                                                                                                                                                                                                                                                                                                                                                                                                                                                                                                                                                                                                                                                                                   |
| Secondary Subject Heading:      | Epidemiology, General practice / Family practice                                                                                                                                                                                                                                                                                                                                                                                                                                                                                                                                                                                                                                                                                |
| Keywords:                       | EPIDEMIOLOGY, quality of life, prevalence, chronic fatigue                                                                                                                                                                                                                                                                                                                                                                                                                                                                                                                                                                                                                                                                      |
|                                 |                                                                                                                                                                                                                                                                                                                                                                                                                                                                                                                                                                                                                                                                                                                                 |

SCHOLARONE™  
Manuscripts

1  
2  
3 **Prevalence and characteristics of Chronic fatigue syndrome/Myalgic encephalomyelitis**  
4 **(CFS/ME) in Poland: A cross-sectional study**  
5  
6  
7

8 Joanna Słomko<sup>1</sup>, Julia L. Newton<sup>2</sup>, Sławomir Kujawski<sup>1</sup>, Małgorzata Tafil-Klawe<sup>3</sup>, Jacek J.  
9 Klawe<sup>1</sup>, Donald Staines<sup>4</sup>, Sonya Marshall-Gradisnik<sup>4</sup>, Paweł Zalewski<sup>1</sup>  
10  
11  
12  
13

14  
15 <sup>1</sup> Department of Hygiene, Epidemiology and Ergonomy, Faculty of Health Sciences Ludwik  
16 Rydygier Collegium Medicum in Bydgoszcz Nicolaus Copernicus University in Torun, M.  
17 Skłodowskiej-Curie 9, Bydgoszcz 85-094, Poland  
18  
19

20 <sup>2</sup> Institute of Cellular Medicine, The Medical School, Newcastle University, Framlington Place  
21 Newcastle-upon-Tyne NE2 4HH  
22

23 <sup>3</sup> Department of Human Physiology, Faculty of Medicine Ludwik Rydygier Collegium  
24 Medicum in Bydgoszcz Nicolaus Copernicus University in Torun, Ludwik Rydygier Collegium  
25 Medicum in Bydgoszcz, Karłowicza 24, Bydgoszcz 85-092, Poland  
26  
27

28 <sup>4</sup> The National Centre for Neuroimmunology and Emerging Diseases, Menzies Health Institute  
29 Queensland, Griffith University, Gold Coast, QLD, Australia.  
30  
31  
32  
33  
34  
35  
36

37 Corresponding author:

38 Paweł Zalewski

39 Department of Hygiene, Epidemiology and Ergonomics,

40 Nicolaus Copernicus University in Torun,

41 M. Skłodowskiej-Curie 9, 85-094

42 Bydgoszcz,

43 Poland;

44 tel. +48 52 585-36-16;

45 E-mail: p.zalewski@cm.umk.pl  
46  
47  
48  
49  
50  
51  
52  
53  
54  
55  
56  
57  
58  
59  
60

## Abstract

**Objectives:** The aim of this study was to estimate the prevalence of chronic fatigue syndrome/myalgic encephalomyelitis (CFS/ME) and describe illness characteristics in a community population in Poland. Design: cross-sectional study

Setting: Poland

Participants: Of the cohort of 1400 who self-presented with fatigue only 69 subsequently were confirmed as having CFS/ME using the Fukuda criteria.

Main outcome measures: Participants completed the following screening symptom assessment tools: Chalder fatigue scale, Hospital anxiety and depression scale (HADS), Epworth sleepiness scale (ESS), COMPASS 31, Quality of life scale (QOLS). Hemodynamic and autonomic parameters were automatically measured at rest with a Task Force Monitor.

**Results:** In 1308 from 1400 (93%) individuals who identified themselves as fatigued, recognized chronic conditions were identified e.g. neurological (n=280, 21.5%), neurodegenerative (n=200, 15%), psychiatric (n=654, 50%) and immunologic (n=174, 13.5%) disorders. The remaining 69 participants (mean age 38.3±8.5) met the Fukuda definition for CFS/ME and had baseline objective assessment. The majority had experienced symptoms for over 2 years with 37% having symptoms for 2-5 years and 21.7% for more than 10 years. The Composite Autonomic Symptom Score 31 (COMPASS 31) indicated that 50% have symptoms consistent with orthostatic intolerance. 43/69 (62%) had Epworth sleepiness scores  $\geq 10$  i.e. consistent with excessive daytime sleepiness, 26/69 (38%) had significant anxiety and 22/69 (32%) depression measured by HADS A & D. Quality of life is significantly impaired in those with Fukuda criteria CFS (QLS score 64±11) with significant negative relationships between quality of life and fatigue ( $p < 0.0001$ ), anxiety ( $p = 0.0009$ ), depression ( $p < 0.0001$ ) and autonomic symptoms ( $p = 0.04$ ).

**Conclusion:** This is the first study to summarize illness characteristics of Polish CFS/ME patients. Our study has confirmed that fatigue is a common and under-recognised symptom affecting the Polish population.

**Key words:** chronic fatigue, epidemiology, prevalence, quality of life

1  
2  
3 Strengths and limitations of this study  
4

- 5 • This is the first study to summarize illness characteristics of a cohort of Polish CFS/ME  
6 patients.  
7
- 8 • We used Fukuda criteria to indicate patients with CFS/ME.  
9
- 10 • Recruitment was based on self-identification in response to an advertisement in  
11 CFS/ME community support networks across Poland.  
12
- 13 • Methodologically more robust epidemiological studies of fatigue and its consequences  
14 in the Polish population are now needed.  
15  
16  
17  
18  
19  
20  
21  
22  
23  
24  
25  
26  
27  
28  
29  
30  
31  
32  
33  
34  
35  
36  
37  
38  
39  
40  
41  
42  
43  
44  
45  
46  
47  
48  
49  
50  
51  
52  
53  
54  
55  
56  
57  
58  
59  
60

For peer review only

## Introduction

Diagnostics and treatment of the Chronic Fatigue Syndrome/Myalgic encephalomyelitis (CFS/ME) present a challenge to specialists as this syndrome is not a clearly identified, uniform disease but a set of symptoms resembling those occurring in other diseases, in which a sense of chronic fatigue predominates. In some countries (e.g Poland), CFS/ME is diagnosed very rarely, which may be associated with the fact that the aetiology of the disease is still poorly known, and with diagnostic problems resulting from a lack of detailed and uniform guidelines allowing an unambiguous diagnosis and initiation of effective treatment in CFS/ME patients.

The available studies provide several diagnostic criteria based on a definition of the American Centers for Disease Control (CDC), the Oxford Criteria, or the Canadian Guidelines. Criteria proposed by CDC (Fukuda et al. 1994) are most commonly used as acceptable diagnostic criteria when recruiting CFS/ME patients for scientific studies. However, they are encumbered by several disadvantages (e.g. fatigue experienced for at least 6 months), which – from the point of view of clinical practice – may delay a diagnosis in patients who do not meet this criterion precisely. The Oxford criteria propose a new diagnostic approach, focusing mainly on an aspect of mental rather than somatic fatigue. The Canadian criteria (CDC) expand the CFS/ME definition with additional diagnostic criteria, i.e. post-exertional malaise and presence of neurological, endocrine, cognitive and autonomic (orthostatic intolerance) disorders. The proposed CFS/ME definition, including malaise and symptoms exacerbation after exercise, allows differentiating CFS/ME patients from patients with depression or fibromyalgia. Alternative criteria, such as the International Consensus Criteria (ICC), disclose a further range of symptoms pertaining to the neurological, immunological, gastrointestinal, and autonomic systems.

Its global prevalence, ranging between 0.4% and 2.5%, is growing; most commonly, it is observed in the group of 20–40-year-olds, more frequently in professionally active women. CFS/ME is considered to be a common condition in countries such as the UK, Australia and the US [1,2]. In the UK, it affects up to 250,000 individuals with frequencies reported of up to 0.2% [3]. In the UK, Fukuda-defined cases have a prevalence of 0.2%. In the US, the prevalence of Fukuda-defined cases has been reported between 0.2% and 0.4%. Finding from the Australian cohort showed that from 535 patients diagnosed with CFS/ME by a primary care physician, 30.28% met Fukuda criteria. To date CFS/ME has not been reported in Poland, nor its prevalence defined. There are currently no CFS/ME Clinical services.

1  
2  
3 The aim of this study was to summarize sociodemographic and illness characteristics in those  
4 reporting CFS/ME symptoms in a Polish population. We set out to define the presence and  
5 characteristics of CFS/ME in Poland in order to identify a cohort of those patients who could  
6 potentially participate in further research studies.  
7  
8  
9

## 10 **METHODS**

### 11 **Setting**

12  
13  
14 This study took place from March 2014 till July 2016 and was approved by the Ethics  
15 Committee, Ludwik Rydygier Memorial Collegium Medicum in Bydgoszcz, Nicolaus  
16 Copernicus University, Toruń. Written informed consent was obtained from all of the  
17 participants.  
18  
19

### 20 **Participants**

21  
22 Recruitment was based on self-identification in response to an advertisement in CFS/ME  
23 community support networks across Poland, as well as a general advertisement on local radio  
24 and social media.  
25  
26

27  
28 Initially any individuals willing to participate were directed to a phone line. Within days of  
29 setting up the phone line it became clear that this mechanism to identify and recruit potential  
30 participants would be overwhelmed. The team therefore directed all potential participants to a  
31 website where more information about the study was available and where individuals were  
32 invited to self-complete the Fukuda criteria online. If individuals, on completing the online  
33 scoring, felt that they met the Fukuda criteria [4] within 7 days they were invited to attend the  
34 research facility. To be eligible for this study, participants were required to 1) meet Fukuda  
35 criteria, 2) be between 25 and 65 years of age, and 3) be a resident of Poland. The identification  
36 process is shown in **Figure 1**.  
37  
38  
39  
40  
41  
42  
43

### 44 **Patient and public involvement**

45  
46  
47 Patients were not involved in the design of this study. Results from the current study will be  
48 disseminated to participants through newsletters in layman terms. We will also communicate  
49 our results through a number of other scientific and non-scientific channels including  
50 presentations at relevant congresses or in relevant fora.  
51  
52  
53

### 54 **Clinical assessment**

55  
56 Those who fulfilled the eligibility criteria for Centers for Disease Control and Prevention  
57 (Fukuda) were invited to attend the research unit at the chronobiology laboratory (windowless  
58 and sound-insulated room, temperature 22°C, humidity 60%). They were seen by members of  
59  
60



1  
2  
3 the research team in an assessment that took place over 40 minutes. Individuals participated in  
4 a standardized baseline assessment which comprised a battery of symptom assessment tools.  
5 Those screened as fulfilling criteria for CFS/ME [4] were also reviewed clinically by a member  
6 of the research team in order to determine whether their symptoms were consistent with these  
7 criteria, that there were no psychiatric exclusions or other diagnoses that could be associated  
8 with CFS/ME or where fatigue was not the primary complaint. Sixty nine individuals  
9 subsequently went on to have a further baseline objective assessment.

### 15 **Symptom assessment tools**

16  
17 Participants completed the following screening symptom assessment tools: Chalder Fatigue  
18 Scale (CFQ) [5-7], Hospital anxiety and depression scale (HADS) [8], Epworth sleepiness scale  
19 (ESS) [9], Composite Autonomic Symptom Score 31 (COMPASS 31) [10,11], Quality of life  
20 scale (QOLS) [10-14].

### 24 **Functional assessment of the cardiac and autonomic nervous system**

25 Cardiovascular and autonomic nervous system measurements were performed with a dedicated  
26 high-tech device – Task Force Monitor (TFM, CNSystems, Medizintechnik, Graz, Austria).  
27 The main area of TFM application is beat-to-beat analysis of heart rate (electrocardiogram  
28 (ECG)) oscillometric and non-invasive continuous blood pressure measurements (oscBP,  
29 contBP) and impedance cardiography. [15-22]. A detailed of study protocol and its  
30 methodology have been presented in our previous articles [23,24].

31  
32 In all cases TFM measurements were performed during 10 minutes of supine rest (phase 1) and  
33 subsequently asked to standing (phase 2) during which changes in heart rate were assessed and  
34 where haemodynamic changes were consistent with recognized consensus criteria for a  
35 diagnosis of postural tachycardia syndrome made [25].

36 We classified each individual's autonomic function profile into sympathetic or parasympathetic  
37 dominant according to their sympathetico-vagal balance during 10 minutes of supine rest. This  
38 was based upon previous studies and assessed using the LF/HF ratio which was considered to  
39 suggest a sympathetic dominant pattern if LF/HF was  $>1$  and parasympathetic if the ratio was  
40  $<1$ . [26, 27]

### 51 **Statistical analyses**

52  
53 Statistical characteristics of measured values were presented as arithmetic means and standard  
54 deviations ( $\pm$ SD). The normality of continuous variables distribution was evaluated with the  
55 *Shapiro–Wilk* test Depending on distribution characteristics of analysed variables, the  
56 independent samples Student t-test or the Mann–Whitney U test was used to evaluate  
57 significance of differences between measured values obtained in the group of each phenotypes.  
58  
59  
60

All calculations were performed with the package *Statistica 13.0* (StatSoft), with the assumed level of statistical significance of  $\alpha < 0.05$ .

## RESULTS

### Recruitment of the cohort – the prevalence of fatigue in a Polish population

During the media campaign 1400 individuals identified themselves to the research team as fitting, they believed, the criteria for CFS/ME. 1308 of those subsequently were found not to meet the Fukuda criteria for CFS/ME.

In the 1308 (93%) individuals who identified themselves as fatigued, recognized chronic conditions were identified. These were conditions associated with the symptom of fatigue and therefore could have been the attributable cause for their fatigue symptoms (and therefore not consistent with the Fukuda diagnostic criteria). These fatigue associated conditions were broadly classified into conditions that were: neurological (n=280, 21.5%), neurodegenerative (n=200, 15%), psychiatric (n=654, 50%) and immunologic (n=174, 13.5%) disorders.

### Characteristics of a polish cohort of CFS/ME patients meeting the Fukuda criteria

Of the total group with CFS/ME, 41 were female (59.4%). The majority of individuals had a normal BMI (58%) with 24 (35%) being considered overweight and 3 (4.3%) being obese. Two individuals (2.9%) were considered underweight. The majority of individuals were considered to be of a specialist professional group (engineers).

### Symptom burden of a polish cohort of CFS/ME patients meeting the Fukuda criteria

The majority of those with CFS/ME had had symptoms for over 2 years with 37% having symptoms for 2-5 years and 21.7% having symptoms for more than 10 years. The vast majority described unrefreshing sleep with impaired short-term memory and concentration (91.3%), post-exertional malaise 89%, multi-joint pain without swelling or redness 72.5%, headaches 62.3%, muscle pain 66.7%, sore throat 39.1% and tender cervical or axillary lymph nodes 30.4%.

**Table 1** shows the prevalence of other symptoms identified in those found to have Fukuda CFS/ME. This illustrates the fact that many clinical specialists may come into contact with individuals who may subsequently be identified as having CFS/ME. When COMPASS 31 scores were considered these are shown in **Table 2** with 50% of individuals with CFS/ME having symptoms consistent with orthostatic intolerance. HAD scores were high for both anxiety and depression and 43/69 (62%) were found to have ESS scores  $\geq 10$  i.e. consistent with excessive daytime sleepiness. Considering scores from HADS A & D, 26/69 (38%) had scores consistent with significant anxiety and 22/69 (32%) depression.

### Quality of life of a polish cohort of CFS/ME patients meeting the Fukuda criteria

1  
2  
3 Quality of life scores assessed using the QOLS were mean (SD) 64 (11). This confirmed that  
4 quality of life is significantly impaired in those with Fukuda criteria CFS/ME and well below  
5 the expected for a healthy population. When we considered the relationship between quality of  
6 life and the other symptoms frequently seen in those with CFS/ME, there were strong  
7 significant negative relationships between quality of life and fatigue ( $p<0.0001$ ), anxiety  
8 ( $p=0.0009$ ), depression ( $p<0.0001$ ) and autonomic symptoms ( $p=0.04$ ), figure 2. There were  
9 no significant relationships between age or daytime sleepiness.

### 15 **Autonomic function in a polish cohort of CFS/ME patients meeting the Fukuda criteria**

16 When we classified the cohort according to predominance of sympathetic or parasympathetic  
17 function, 44/69 (64%) were found to be sympathetic predominant and 25 parasympathetic.  
18 When we considered symptom burden between these two phenotypes, there were no significant  
19 differences in symptoms or impact upon quality of life between the groups (**Table 3**). At rest,  
20 the sympathetic predominant group had significantly higher heart rate, ER and LF HRV and  
21 reduced LVET, PEP and HF HRV compared to the parasympathetic group. The total PSD was  
22 comparable between groups however sympathicovagal balance was different between the  
23 phenotypes with increased LF BPV in both diastolic and systolic blood pressure, reduced  
24 baroreflex sensitivity in those with the sympathetic dominant phenotype (**Table 4**).

25 Those with the parasympathetic predominant phenotype were more likely to have had the  
26 disease for between 5-10 years (**table 5**).

### 36 **Prevalence of postural tachycardia syndrome in a Polish cohort of CFS/ME patients**

37 The presence of postural tachycardia syndrome is frequently seen in those with CFS [28,29].  
38 A total of 35 (51%) of the CFS group had haemodynamic responses to standing consistent with  
39 a diagnosis of PoTS. There was no difference in the proportion of those with PoTS in the  
40 sympathetic or parasympathetic groups (**Table 5**).

## 44 **DISCUSSION**

45 This study has confirmed for the first time that chronic fatigue is a common symptom  
46 experienced by the Polish population and that CFS/ME is an under-recognized syndrome in this  
47 group. The key finding of this study is that prevalence is similar to reported data in the other  
48 countries and is associated with a large symptom burden and impaired quality of life.

49 Of the cohort of 1400 who self-presented with fatigue only 69 subsequently were confirmed as  
50 having CFS/ME using the Fukuda criteria. This suggests that in Poland there are significant  
51 amounts of fatigue related to other conditions, with only a small percentage of those  
52 experiencing fatigue having CFS/ME *per se* (69/1400; 5%).

1  
2  
3 From the initial responses, we rigorously identified those who met with Fukuda criteria for  
4 CFS/ME. We did this by asking individuals to complete the tool, but also using face to face  
5 sessions with trained clinicians. We believe therefore, that our cohort represents a well  
6 characterized group who we are confident fulfil one of the recognised diagnostic criteria for  
7 CFS/ME. When we compared this Polish cohort with CFS/ME to other national cohorts there  
8 were some similarities, but also some differences.  
9

10 Compared with the UK cohort [30] having in excess of 6500 individuals collected from the UK  
11 NHS Clinical CFS services, the Polish cohort appeared to be of a similar age to the UK cohort  
12 with comparable levels of fatigue and illness duration, have similar levels of sleep and cognitive  
13 symptoms but less post-exertional malaise, muscle pain and headaches. The Polish cohort  
14 appeared to have more males than was seen in the UK cohort.  
15

16 As in previous national cohorts [3, 30, 31], the presence of fatigue in the Polish population was  
17 associated with impaired quality of life. As has been seen previously, impaired quality of life  
18 associates with the severity of symptoms such as fatigue and autonomic dysfunction, but in  
19 contrast to other studies, not daytime sleepiness. Impaired quality of life is also associated with  
20 increased anxiety and more depression. As in other series, we would suggest that this  
21 association is a secondary phenomenon i.e. arising as a consequence of the condition rather than  
22 a cause. The fact that we rigorously excluded depression and psychiatric disorders when  
23 determining the criteria would be consistent with this.  
24

25 Our study has also confirmed a high prevalence of the condition postural tachycardia syndrome  
26 (PoTS). This form of dysautonomia [21] has been recognized as occurring frequently in those  
27 with CFS/ME [28,29], and represents a potential therapeutic target in those with this illness. It  
28 is important that clinicians and researchers are aware of the overlap and are trained to identify  
29 and manage this condition.  
30

31 All of these differences might arise because of the self-report nature of the Polish cohort and  
32 that the UK cohort was recruited from the National Health Service clinical services which were  
33 specifically set up to identify and manage CFS/ME [3]. A comprehensive review of the  
34 prevalence of CFS/ME in three regions of England involving 143,000 subjects suggested an  
35 older cohort with longer disease duration than that seen in the UK clinical services.  
36

37 An Australian cohort [31] was established using similar identification strategies to our Polish  
38 cohort with self-report in response to adverts inviting individuals to participate in a research  
39 database. Individuals in this cohort were included if they had received the diagnosis from a  
40 primary care physician. Again the proportion of females in the Australian cohort was higher  
41 than in the Polish cohort  
42  
43  
44  
45  
46  
47  
48  
49  
50  
51  
52  
53  
54  
55  
56  
57  
58  
59  
60

1  
2  
3 This study has a number of limitations. The case ascertainment process used self-report as the  
4 means of identifying those with CFS/ME. It became clear during the radio and television  
5 campaign that there was considerable interest, and as a result our recruitment process needed  
6 to be changed to facilitate timely screening of those self-presenting with fatigue. It is clear that  
7 a thorough, methodologically robust epidemiological study of fatigue and its consequences in  
8 a Polish population are now needed.  
9

10  
11  
12 Our study has confirmed that fatigue is a common and under-recognised symptom affecting the  
13 Polish population. It impacts upon quality of life and is associated with a range of other  
14 symptoms that have been previously recognised in other cohort studies. Despite this, there are  
15 no clinical services for fatigue or CFS/ME in Poland and it is poorly understood and  
16 infrequently diagnosed. Our research programme now aims to consider the effect of  
17 interventions upon fatigue in a Polish CFS/ME population.  
18  
19  
20  
21  
22  
23  
24  
25  
26  
27  
28  
29  
30  
31  
32  
33  
34  
35  
36  
37  
38  
39  
40  
41  
42  
43  
44  
45  
46  
47  
48  
49  
50  
51  
52  
53  
54  
55  
56  
57  
58  
59  
60

1  
2  
3 **Figure legends**  
4

5 Figure 1: Study protocol

6 Figure 2: The relationship between quality of life measured using the QOLS scale and a) fatigue  
7 severity assessed using the fatigue impact scale b) anxiety measured using the HADS Anxiety  
8 scale (HADS -1 ) c) depression measured using the HADS Depression Scale (HADS – 2) and  
9 d) autonomic symptom burden measured using the COMPASS 31  
10  
11  
12  
13  
14  
15  
16  
17  
18  
19  
20  
21  
22  
23  
24  
25  
26  
27  
28  
29  
30  
31  
32  
33  
34  
35  
36  
37  
38  
39  
40  
41  
42  
43  
44  
45  
46  
47  
48  
49  
50  
51  
52  
53  
54  
55  
56  
57  
58  
59  
60

For peer review only

**Contributorship statement**

JS, DS, SMG, PZ were involved in writing of the manuscript. JS, PZ, JJK and MTF conceived and supervised the study. SK, PZ provided statistical advice. JS, PZ, JN, DS., SMG contributed conceived, designed and performed the experiments, collected and analyzed the data, revising it critically for important intellectual content and final approval of the version to be submitted.

**Competing interests:** none declared.

**Funding:** none

**data sharing:** no additional data are available.

For peer review only

## REFERENCES

1. Chronic Fatigue Syndrome/Myalgic Encephalomyelitis (encephalopathy); diagnosis and management. [www.nice.gov.org](http://www.nice.gov.org)
2. Institute of Medicine. Beyond Myalgic Encephalomyelitis/Chronic Fatigue Syndrome Redefining an Illness Committee on the Diagnostic Criteria for Myalgic Encephalomyelitis/Chronic Fatigue Syndrome; Board on the Health of Select Populations; Institute of Medicine. Washington (DC): National Academies Press (US); 2015 Feb 10. ISBN-13: 978-0-309-31689-7 ISBN-10: 0-309-31689-8
3. Nacul LC, Lacerda EM, Pheby D, Campion P, Molokhia M, Fayyaz S, Leite JCDC, Poland F, Howe A, Drachler ML. Prevalence of myalgic encephalomyelitis/chronic fatigue syndrome (ME/CFS) in three regions of England: a repeated cross sectional study in primary care. *BMC Medicine* 2011;9:91.
4. Fukuda K, Straus SE, Hickie I, Sharpe MC, Dobbins JG, Komaroff A, International Chronic Fatigue Syndrome Study Group. The Chronic Fatigue Syndrome: A Comprehensive Approach to Its Definition and Study. *Annals of Int Med.* 1994;121:953-959.
5. Chalder T, Berelowitz G, Pawlikowska T, Watts L, Wessely S, Wright D, et al. (1993) Development of a fatigue scale. *Journal of Psychosomatic Research*,37: 147-53.
6. Morriss RK Wearden AJ Mullis R . Exploring the validity of the Chalder Fatigue Scale in chronic fatigue syndrome. *J Psychosom Res* 1998;45:411–417.
7. De Vries J Michielsen HJ Van Heck GL . Assessment of fatigue among working people: a comparison of six questionnaires. *Occup Environ Med* 2003;60(Suppl. 1):i10–i15.
8. Zigmond, A. S., & Snaith, R.P. (1983). The Hospital Anxiety And Depression Scale, *Acta Psychiatrica Scandinavica*, 67, 361-370.
9. Johns MW. A new method for measuring daytime sleepiness: the Epworth sleepiness scale. *Sleep.* 1991 Dec;14(6):540-5.
10. Suarez et al., *Neurology*, 1999, 52(3):523-528
11. David M. Sletten,<sup>a</sup> Guillermo A. Suarez,<sup>†</sup>,<sup>a</sup> Phillip A. Low,<sup>a</sup> Jay Mandrekar,<sup>b</sup> and Wolfgang Singera COMPASS 31: A Refined and Abbreviated Composite Autonomic Symptom Score. *Mayo Clin Proc.* 2012 Dec; 87(12): 1196–1201.
12. Burckhardt CS, Woods SL, Schultz AA, Ziebarth DM (1989). Quality of life of adults with chronic illness: A psychometric study. *Research in Nursina and Health*, 12, 347-354.



13. Burckhardt, CS, Clark SR, Bennett RM (1993). Fibromyalgia and quality of life: A comparative analysis. *Journal of Rheumatology*, 20, 475-479.
14. Flanagan JC (1978). A research approach to improving our quality of life. *American Psychologist*, 33, 138-147.
14. Flanagan JC (1982). Measurement of quality of life: Current state of the art. *Archives of Physical Medicine and Rehabilitation*, 63, 56-59.
15. Fortin J, Habenbacher W, Gruellenberger R, Wach P, Skrabal F. Real time monitor for hemodynamic beat-to-beat parameters and power spectra analysis of biosignals. *Proceedings of the 20th annual International Conference of the IEEE Engineering in Medicine and Biology Society*; 1998 29 Oct-1 Nov; Hong Kong.
16. Fortin J, Klinger Th, Wagner Ch, Sterner H, Madritsch Ch, Grüllenberger R. et al. The Task Force Monitor—a non-invasive beat-to-beat monitor for hemodynamic and autonomic function of the human body. *Proceedings of the 20th annual International Conference of the IEEE Engineering in Medicine and Biology Society*; 1998 29 Oct-1 Nov; Hong Kong.
17. Fortin J, Marte W, Grullenberger R. Continuous non-invasive blood pressure monitoring using concentrically interlocking control loops. *Comput Biol Med* 2006; 36:941-57.
18. Parati G, Ongaro G, Bilo G, Glavina F, Castiglioni P, Di Renzo M. et al. Non-invasive beat-to-beat blood pressure monitoring: new developments. *Blood Press Monit* 2003; 8:31-6.
19. Bianchi AM, Mainardi LT, Meloni C, Chierchia S, Cerutti S. Continuous monitoring of the sympatho-vagal balance through spectral analysis. *IEEE Eng Med Biol Mag* 1997;16:64-73.
20. Taskforce of the European Society of Cardiology and the North American Society of Pacing and Electrophysiology. Heart rate variability: Standards of measurement, physiological interpretation, and clinical use. *Eur Heart J* 1996;17:354-81.
21. Stauss HM. Heart rate variability. *Am J Physiol Integr Comp Physiol* 2003;285:R927-31.
22. Akselrod S, Gordon D, Madwed JB, Sanidman NC, Shannon DC, Cohen RJ. Hemodynamic regulation: investigation by spectral analysis. *Am J Physiol* 1985; 249:H867-75.
23. Frith J<sup>1</sup>, Zalewski P, Klawe JJ, Pairman J, Bitner A, Tafil-Klawe M, Newton JL. Impaired blood pressure variability in chronic fatigue syndrome--a potential biomarker. *QJM*. 2012; 105:831-8
24. Słomko J, Zawadka-Kunikowska M, Kujawski S, Klawe JJ, Tafil-Klawe M, Newton JL, Zalewski P. Do Changes in Hemodynamic Parameters Depend Upon Length of Sleep Deprivation? Comparison Between Subjects With Normal Blood Pressure, Prehypertension, and Hypertension. *Front Physiol*. 2018; 28:1374
25. Sheldon RS, Grubb BP, Olshansky B, Shen W, Calkins H, Brignole M, Raj SR, Krahn AD, Morillo CA, Stewart JM, Sutton R, Sandroni P, Friday KJ et al., Heart Rhythm Society Expert

1  
2  
3 Consensus Statement on the Diagnosis and Treatment of Postural Tachycardia Syndrome,  
4 Inappropriate Sinus Tachycardia, and Vasovagal Syncope. *Heart Rhythm* 2015; 12: e41-e63  
5  
6 <https://doi.org/10.1016/j.hrthm.2015.03.029>  
7  
8  
9

10 26. Eckberg DL. Sympathovagal Balance. A critical appraisal.

11 27. Malliani A, Pagani M, Montana N, Mela GC. Sympathovagal Balance. A reappraisal.  
12 *Circulation* 1998;98:2640-2643.  
13

14 28. A Hoad, G Spickett , J Elliott , J Newton. Postural Orthostatic Tachycardia Syndrome Is an  
15 Under-Recognized Condition in Chronic Fatigue Syndrome. *QJM* 101 (12), 961-965. 2008 Sep  
16  
17  
18 19

20 29. G K Reynolds 1 , D P Lewis , A M Richardson , B A Lidbury. Comorbidity of Postural  
21 Orthostatic Tachycardia Syndrome and Chronic Fatigue Syndrome in an Australian Cohort. *J*  
22 *Intern Med* 275 (4), 409-417. 2013 Nov 29.  
23  
24

25 30. Collin S, Nuevo R, van de Putte EM, Nijhof SL, Crawley E. Chronic Fatigue Syndrome  
26 (CFS) or Myalgic encephalomyelitis (ME) is different in children compared to in adults: a study  
27 of UK and Dutch clinical cohorts. *BMJ Open* 2015;5:e008830  
28  
29

30 31. Johnston SC, Staines DR, Marshall-Gradisnik SM. Epidemiological characteristics of  
31 chronic fatigue syndrome/myalgic encephalomyelitis in Australian patients. *Clinical*  
32 *Epidemiology* 2016;8:97-107.  
33  
34  
35  
36  
37  
38  
39  
40  
41  
42  
43  
44  
45  
46  
47  
48  
49  
50  
51  
52  
53  
54  
55  
56  
57  
58  
59  
60

**TABLE 1: OTHER SYMPTOMS REPORTED AT INITIAL ASSESSMENT, N=69**

| Specific symptom                                       | No | %    |
|--------------------------------------------------------|----|------|
| IBS                                                    | 12 | 17.7 |
| Migraine                                               | 17 | 24.6 |
| seasonal allergy                                       | 8  | 11.6 |
| slight food intolerance / nausea / alcohol intolerance | 40 | 58.1 |
| back pain                                              | 13 | 18.8 |
| Tinnitus                                               | 9  | 13.0 |
| palpitations with no cardiac history                   | 9  | 13.0 |
| periodical fever                                       | 8  | 11.6 |
| sensory disturbances                                   | 0  | 0    |
| chest symptoms with no medical history                 | 15 | 21.7 |
| mood fluctuations                                      | 30 | 43.5 |
| chronic stress                                         | 41 | 59.4 |
| overworked / work stress                               | 34 | 49.3 |
| shift work                                             | 0  | 0    |
| care work                                              | 3  | 4.3  |
| newborn care                                           | 7  | 10.1 |
| frequent infections                                    | 9  | 13.0 |
| night hyperhidrosis                                    | 22 | 31.9 |
| sleep disturbance / hypersomnia                        | 28 | 40.6 |
| unexplained anxiety                                    | 3  | 4.3  |
| sensory disturbance                                    | 10 | 14.5 |

review only

**TABLE 2: COMPASS 31 - AUTONOMIC SYMPTOMS, N=69**

| <b>Specific symptom</b>      | <b>No</b> | <b>%</b> |
|------------------------------|-----------|----------|
| orthostatic intolerance      | 40        | 50.0     |
| dizziness / headaches        | 41        | 59.4     |
| sudden paleness              | 25        | 36.2     |
| arrhythmia                   | 29        | 42.0     |
| dryness eyes mouth           | 45        | 65.2     |
| vasomotor                    | 24        | 34.8     |
| secretomotor                 | 30        | 43.5     |
| upper gastro. tract symptoms | 38        | 55.1     |
| unknown gastro. pain         | 26        | 37.7     |
| constipation                 | 21        | 30.4     |
| diarrhea                     | 28        | 40.6     |
| urinary                      | 21        | 30.4     |
| sexual failure               | 19        | 27.5     |
| sleep                        | 68        | 98.5     |
| pupilomotor                  | 28        | 40.6     |
| anxiety                      | 34        | 49.3     |

**TABLE 3: BASELINE QUALITY OF LIFE SCORES, N=69**

| Variable                  | Total Group |      | Sympathetic dominant (n=44) |      | parasympathetic dominant (n=25) |      |        |
|---------------------------|-------------|------|-----------------------------|------|---------------------------------|------|--------|
|                           | Mean        | SD   | Mean                        | SD   | Mean                            | SD   |        |
| Chalder Fatigue Scale     | 25.3        | 3.7  | 25.5                        | 3.8  | 25.0                            | 3.8  | p>0.05 |
| Fatigue Severity Scale    | 48.8        | 8.7  | 48.0                        | 8.5  | 50.2                            | 9.1  | p>0.05 |
| Fatigue Impact Scale      | 92.2        | 26.2 | 92.6                        | 24.6 | 91.6                            | 29.2 | p>0.05 |
| HADS_A                    | 9.6         | 3.4  | 9.3                         | 3.1  | 10.1                            | 3.9  | p>0.05 |
| HADS_D                    | 8.5         | 3.1  | 8.5                         | 3.0  | 8.6                             | 3.4  | p>0.05 |
| BDI                       | 17.6        | 8.1  | 18.3                        | 8.3  | 16.4                            | 7.9  | p>0.05 |
| Epworth Sleepiness Scale  | 10.3        | 5.6  | 10.6                        | 5.3  | 9.8                             | 6.2  | p>0.05 |
| Quality of Life Scale     | 63.5        | 10.9 | 62.1                        | 11.9 | 65.9                            | 8.8  | p>0.05 |
| Orthostatic Grading Scale | 8.4         | 3.1  | 3.5                         | 3.4  | 3.4                             | 2.5  | p>0.05 |

review only

**TABLE 4 CARDIOVASCULAR / AUTONOMIC PARAMETERS**

|                                             | Variable                 | Total group (n=69) |        | Sympathetic dominant (n=44) |        | parasympathetic dominant (n=25) |        |        |
|---------------------------------------------|--------------------------|--------------------|--------|-----------------------------|--------|---------------------------------|--------|--------|
|                                             |                          | Mean               | SD     | Mean                        | SD     | Mean                            | SD     |        |
| <b>Haemodynamics</b>                        | <b>HR</b>                | 67.6               | 9.2    | 70.1                        | 8.4    | 63.2                            | 9.0    | 0.0017 |
|                                             | <b>Sbp</b>               | 117.3              | 13.3   | 118.5                       | 11.3   | 115.2                           | 16.2   | p>0.05 |
|                                             | <b>Dbp</b>               | 79.3               | 10.6   | 79.6                        | 9.7    | 78.8                            | 12.1   | p>0.05 |
|                                             | <b>mBP</b>               | 95.9               | 11.1   | 96.0                        | 9.9    | 95.7                            | 13.2   | p>0.05 |
| <b>Cardiac Impedance</b>                    | <b>SI</b>                | 52.3               | 12.4   | 50.8                        | 12.5   | 54.9                            | 12.1   | p>0.05 |
|                                             | <b>CI</b>                | 3.5                | 0.8    | 3.5                         | 0.8    | 3.4                             | 0.8    | p>0.05 |
|                                             | <b>TPRI</b>              | 2304.7             | 747.3  | 2285.2                      | 684.3  | 2339.0                          | 861.1  | p>0.05 |
|                                             | <b>EDI</b>               | 85.0               | 19.9   | 82.3                        | 19.9   | 89.7                            | 19.5   | p>0.05 |
|                                             | <b>IC</b>                | 62.8               | 21.2   | 59.7                        | 20.6   | 68.2                            | 21.5   | p>0.05 |
|                                             | <b>ACI</b>               | 85.7               | 34.4   | 80.4                        | 33.8   | 95.0                            | 34.3   | p>0.05 |
|                                             | <b>LVWI</b>              | 4.4                | 1.1    | 4.5                         | 1.1    | 4.4                             | 1.2    | p>0.05 |
|                                             | <b>LVET</b>              | 318.2              | 17.3   | 313.2                       | 18.2   | 327.0                           | 11.1   | 0.0005 |
|                                             | <b>TFC</b>               | 31.3               | 4.5    | 30.8                        | 4.7    | 32.3                            | 4.0    | p>0.05 |
|                                             | <b>PEP</b>               | 110.2              | 12.1   | 107.1                       | 11.3   | 115.7                           | 11.6   | 0.0040 |
|                                             | <b>STR</b>               | 34.9               | 4.3    | 34.6                        | 4.7    | 35.5                            | 3.4    | p>0.05 |
|                                             | <b>ER</b>                | 35.5               | 3.3    | 36.3                        | 2.6    | 34.2                            | 3.9    | 0.0092 |
|                                             | <b>MSER</b>              | 300.8              | 68.9   | 306.2                       | 72.5   | 291.4                           | 62.4   | p>0.05 |
|                                             | <b>REP</b>               | 77.8               | 16.8   | 79.7                        | 19.8   | 74.5                            | 9.1    | p>0.05 |
|                                             | <b>HI</b>                | 0.3                | 0.1    | 0.3                         | 0.1    | 0.4                             | 0.1    | p>0.05 |
| <b>RZ</b>                                   | 187.1                    | 12.2               | 185.3  | 11.1                        | 190.4  | 13.6                            | p>0.05 |        |
| <b>TAC</b>                                  | 2.6                      | 0.7                | 2.5    | 0.7                         | 2.8    | 0.8                             | p>0.05 |        |
| <b>Heart rate variability</b>               | <b>LFnu-RRI</b>          | 54.2               | 17.2   | 62.2                        | 14.0   | 40.1                            | 12.7   | 0.0000 |
|                                             | <b>HFnu-RRI</b>          | 45.8               | 17.2   | 37.8                        | 14.0   | 59.9                            | 12.7   | 0.0000 |
|                                             | <b>PSD-RRI</b>           | 1684.1             | 1993.7 | 1604.9                      | 2166.9 | 1823.4                          | 1678.7 | p>0.05 |
|                                             | <b>LF/HF-RRI</b>         | 1.7                | 1.6    | 2.3                         | 1.8    | 0.8                             | 0.4    | 0.0000 |
| <b>Diastolic Blood pressure variability</b> | <b>LFnu-Dbp</b>          | 52.2               | 14.7   | 59.7                        | 10.2   | 38.9                            | 11.7   | 0.0000 |
|                                             | <b>HFnu-dBP</b>          | 14.0               | 10.4   | 11.0                        | 7.5    | 19.3                            | 12.7   | 0.0004 |
|                                             | <b>PSD-dBP</b>           | 13.6               | 16.5   | 15.2                        | 19.3   | 10.8                            | 9.5    | p>0.05 |
|                                             | <b>LF/HF-dBP</b>         | 6.6                | 6.2    | 8.7                         | 6.8    | 2.8                             | 1.8    | 0.0000 |
| <b>Systolic Blood pressure variability</b>  | <b>LFnu-sBP</b>          | 42.1               | 13.5   | 47.5                        | 10.7   | 32.6                            | 12.9   | 0.0000 |
|                                             | <b>HFnu-sBP</b>          | 16.5               | 10.8   | 15.6                        | 11.0   | 18.2                            | 10.4   | p>0.05 |
|                                             | <b>PSD-sBP</b>           | 20.2               | 30.2   | 17.5                        | 16.3   | 25.0                            | 45.5   | p>0.05 |
|                                             | <b>LF/HF-sBP</b>         | 3.8                | 2.8    | 4.5                         | 3.0    | 2.5                             | 1.7    | 0.0019 |
| <b>Baroreflex parameters</b>                | <b>Total Event Count</b> | 17.4               | 13.6   | 21.5                        | 14.4   | 10.2                            | 8.4    | 0.0006 |
|                                             | <b>Total Slope Mean</b>  | 19.6               | 13.0   | 16.7                        | 8.9    | 24.8                            | 17.2   | 0.0114 |
|                                             | <b>Total BEI</b>         | 70.5               | 15.1   | 72.4                        | 14.2   | 67.0                            | 16.4   | p>0.05 |

**TABLE 5: POTS (SYMPATHETIC, N=44; PARASYMPATHETIC, N=25)**

|                                    |                    | sympathetic dominant |      | parasympathetic dominant |      | p      |
|------------------------------------|--------------------|----------------------|------|--------------------------|------|--------|
|                                    |                    | No                   | %    | No                       | %    |        |
| <b>PoTS</b>                        |                    | 22                   | 45.5 | 12                       | 48   | p>0.05 |
| <b>Fatigue period</b>              | 6 month - 2 years  | 8                    | 22.9 | 8                        | 23.5 | p>0.05 |
|                                    | 2-5 years          | 14                   | 40.0 | 12                       | 35.3 | p>0.05 |
|                                    | 5-10 years         | 4                    | 11.4 | 8                        | 23.5 | 0.0492 |
|                                    | more than 10 years | 9                    | 25.7 | 6                        | 17.6 | p>0.05 |
| <b>Fatigue period IQR</b>          |                    | 2-5 years            |      | 6 month - 2 years        |      |        |
| <b>Fatigue period in years IQR</b> |                    | 8                    |      | 2.5                      |      |        |

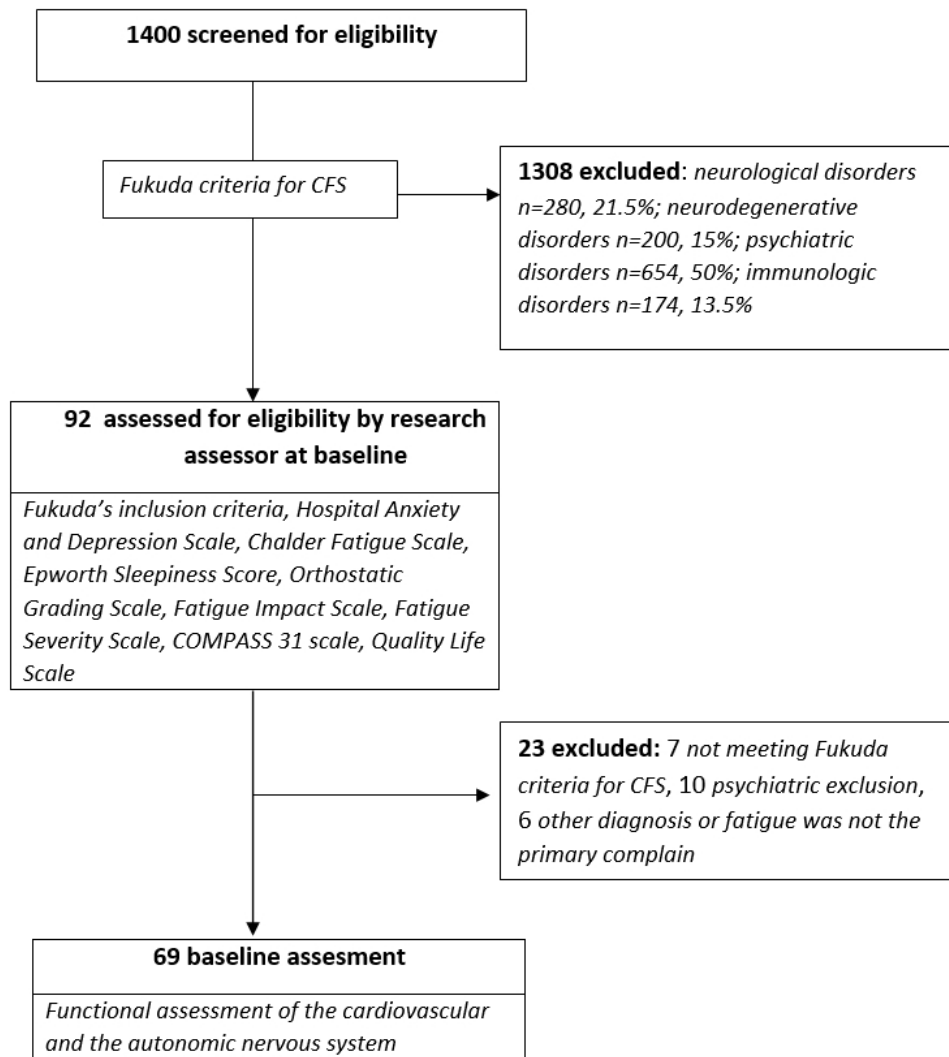

Figure 1. Study protocol



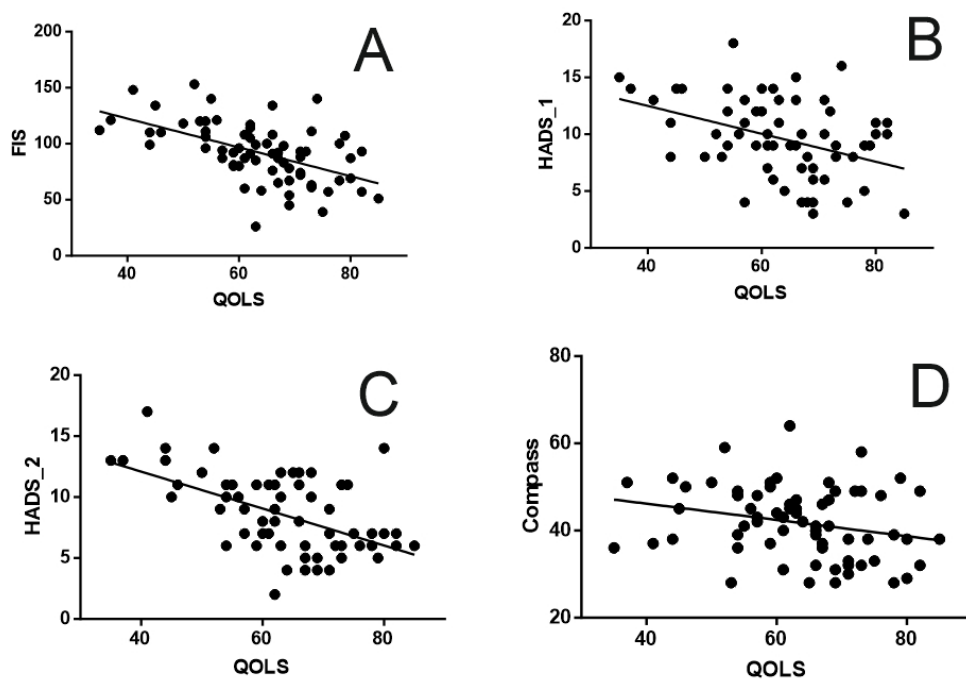

Figure 2: The relationship between quality of life measured using the QOLS scale and a) fatigue severity assessed using the fatigue impact scale b) anxiety measured using the HADS Anxiety scale (HADS -1 ) c) depression measured using the HADS Depression Scale (HADS - 2) and d) autonomic symptom burden measured using the COMPASS 31

STROBE Statement—Checklist of items that should be included in reports of *cross-sectional studies*

|                              | Item No | Recommendation                                                                                                                                                                                    | Page No |
|------------------------------|---------|---------------------------------------------------------------------------------------------------------------------------------------------------------------------------------------------------|---------|
| <b>Title and abstract</b>    | 1       | (a) Indicate the study's design with a commonly used term in the title or the abstract                                                                                                            | 1       |
|                              |         | (b) Provide in the abstract an informative and balanced summary of what was done and what was found                                                                                               | 2       |
| <b>Introduction</b>          |         |                                                                                                                                                                                                   |         |
| Background/rationale         | 2       | Explain the scientific background and rationale for the investigation being reported                                                                                                              | 4       |
| Objectives                   | 3       | State specific objectives, including any prespecified hypotheses                                                                                                                                  | 4, 5    |
| <b>Methods</b>               |         |                                                                                                                                                                                                   |         |
| Study design                 | 4       | Present key elements of study design early in the paper                                                                                                                                           | 5       |
| Setting                      | 5       | Describe the setting, locations, and relevant dates, including periods of recruitment, exposure, follow-up, and data collection                                                                   | 5       |
| Participants                 | 6       | (a) Give the eligibility criteria, and the sources and methods of selection of participants                                                                                                       | 5       |
| Variables                    | 7       | Clearly define all outcomes, exposures, predictors, potential confounders, and effect modifiers. Give diagnostic criteria, if applicable                                                          | 6-9     |
| Data sources/<br>measurement | 8*      | For each variable of interest, give sources of data and details of methods of assessment (measurement). Describe comparability of assessment methods if there is more than one group              | 6-9     |
| Bias                         | 9       | Describe any efforts to address potential sources of bias                                                                                                                                         | 5       |
| Study size                   | 10      | Explain how the study size was arrived at                                                                                                                                                         | 5       |
| Quantitative variables       | 11      | Explain how quantitative variables were handled in the analyses. If applicable, describe which groupings were chosen and why                                                                      | 9       |
| Statistical methods          | 12      | (a) Describe all statistical methods, including those used to control for confounding                                                                                                             | 9       |
|                              |         | (b) Describe any methods used to examine subgroups and interactions                                                                                                                               |         |
|                              |         | (c) Explain how missing data were addressed                                                                                                                                                       |         |
|                              |         | (d) If applicable, describe analytical methods taking account of sampling strategy                                                                                                                |         |
|                              |         | (e) Describe any sensitivity analyses                                                                                                                                                             |         |
| <b>Results</b>               |         |                                                                                                                                                                                                   |         |
| Participants                 | 13*     | (a) Report numbers of individuals at each stage of study—eg numbers potentially eligible, examined for eligibility, confirmed eligible, included in the study, completing follow-up, and analysed | 9       |
|                              |         | (b) Give reasons for non-participation at each stage                                                                                                                                              | 9       |
|                              |         | (c) Consider use of a flow diagram                                                                                                                                                                | Figure  |
| Descriptive data             | 14*     | (a) Give characteristics of study participants (eg demographic, clinical, social) and information on exposures and potential confounders                                                          | 9-11    |
|                              |         | (b) Indicate number of participants with missing data for each variable of interest                                                                                                               | 9-11    |

|                          |     |                                                                                                                                                                                                              |       |
|--------------------------|-----|--------------------------------------------------------------------------------------------------------------------------------------------------------------------------------------------------------------|-------|
| Outcome data             | 15* | Report numbers of outcome events or summary measures                                                                                                                                                         | 9-11  |
| Main results             | 16  | (a) Give unadjusted estimates and, if applicable, confounder-adjusted estimates and their precision (eg, 95% confidence interval). Make clear which confounders were adjusted for and why they were included | 9-11  |
|                          |     | (b) Report category boundaries when continuous variables were categorized                                                                                                                                    | 9-11  |
|                          |     | (c) If relevant, consider translating estimates of relative risk into absolute risk for a meaningful time period                                                                                             | 9-11  |
| Other analyses           | 17  | Report other analyses done—eg analyses of subgroups and interactions, and sensitivity analyses                                                                                                               | 9-11  |
| <b>Discussion</b>        |     |                                                                                                                                                                                                              |       |
| Key results              | 18  | Summarise key results with reference to study objectives                                                                                                                                                     | 11    |
| Limitations              | 19  | Discuss limitations of the study, taking into account sources of potential bias or imprecision. Discuss both direction and magnitude of any potential bias                                                   | 12    |
| Interpretation           | 20  | Give a cautious overall interpretation of results considering objectives, limitations, multiplicity of analyses, results from similar studies, and other relevant evidence                                   | 11-12 |
| Generalisability         | 21  | Discuss the generalisability (external validity) of the study results                                                                                                                                        | 11-12 |
| <b>Other information</b> |     |                                                                                                                                                                                                              |       |
| Funding                  | 22  | Give the source of funding and the role of the funders for the present study and, if applicable, for the original study on which the present article is based                                                | n/a   |

\*Give information separately for exposed and unexposed groups.

**Note:** An Explanation and Elaboration article discusses each checklist item and gives methodological background and published examples of transparent reporting. The STROBE checklist is best used in conjunction with this article (freely available on the Web sites of PLoS Medicine at <http://www.plosmedicine.org/>, Annals of Internal Medicine at <http://www.annals.org/>, and Epidemiology at <http://www.epidem.com/>). Information on the STROBE Initiative is available at [www.strobe-statement.org](http://www.strobe-statement.org).
